# Supplementary material for: Base-mediated intramolecular aryl–aryl coupling in pyrazolyl-containing iodolium salts
Source: Royal Society of Chemistry journal article supplement (doi:10.1039/d4nj02894e), 2024-01-01
Supplement: d4nj02894e1.pdf [file d4nj02894e1.pdf]

## ELECTRONIC SUPPORTING INFORMATION

### Amine-mediated intramolecular aryl–aryl coupling in pyrazolyl-containing iodolium salts

Yana V. Safinskaya,<sup>1</sup> Mikhail V. Il'in,<sup>1</sup> and Dmitrii S. Bolotin<sup>1,\*</sup>

<sup>1</sup> Institute of Chemistry, Saint Petersburg State University, Universitetskaya Nab. 7/9, Saint Petersburg, 199034, Russian Federation

\* Corresponding author E-mail: d.s.bolotin@spbu.ru

#### Table of Contents

|                                                                                                  |     |
|--------------------------------------------------------------------------------------------------|-----|
| Materials and instrumentation.....                                                               | S2  |
| Single-crystal XRD study.....                                                                    | S2  |
| <sup>1</sup> H NMR monitoring of the second step of the Groebke–Blackburn–Bienaymé reaction...S3 |     |
| Synthesis and characterization of <b>1a</b> (OTf) and <b>1b</b> .....                            | S5  |
| Synthesis and characterization of <b>2a</b> (OTf) <sub>2</sub> – <b>2b</b> (OTf).....            | S7  |
| Synthesis and characterization of <b>3</b> (OTf).....                                            | S9  |
| Spectra of <b>1a</b> (OTf)– <b>3</b> (OTf).....                                                  | S11 |
| <sup>1</sup> H NMR monitoring of the reaction of <b>1a</b> (OTf) with bases.....                 | S26 |
| <b>Table S1.</b> Crystal data for <b>2a</b> (OTf) <sub>2</sub> .....                             | S29 |
| <b>Figure S19.</b> A thermal ellipsoid plot for <b>2a</b> (OTf) <sub>2</sub> .....               | S30 |
| References.....                                                                                  | S31 |

**Materials and instrumentation.** All solvents, aldehydes, isocyanides, 2-aminopyridine, were obtained from commercial sources and used as received. The iodonium salts **1a**(OTf)–**2a**(OTf)<sub>2</sub> were synthesized according to published procedures.<sup>1, 2</sup> All syntheses were conducted in air. Chromatographic separation was carried out using Macherey-Nagel silica gel 60 M (0.063–0.2 mm). Analytical TLC was performed on unmodified Merck ready-to-use plates (TLC silica gel 60 F254) with UV detection. Melting points were measured on a Stuart SMP30 apparatus in capillaries and are not corrected. Electrospray ionization mass-spectra were obtained on a Bruker maXis spectrometer equipped with an electrospray ionization (ESI) source. The instrument was operated in positive ion mode using an *m/z* range 50–1200. The nebulizer gas flow was 1.0 bar and the drying gas flow 4.0 L min<sup>-1</sup>. For HRESI<sup>+</sup>, the studied compounds were dissolved in MeOH. <sup>1</sup>H- and <sup>13</sup>C{<sup>1</sup>H} NMR spectra were measured on a Bruker Avance 400 spectrometer in CDCl<sub>3</sub>, (CD<sub>3</sub>)<sub>2</sub>CO, CD<sub>3</sub>CN and (CD<sub>3</sub>)<sub>2</sub>SO at 298 K; the residual solvent signal was used as the internal standard. The NMR monitoring kinetic experiments were carried out by measuring the <sup>1</sup>H NMR spectra every 5 min (four scans; repetition time = 4 s) following the initial equilibration period of 5 min on a Bruker Avance III 500 spectrometer in CD<sub>3</sub>CN at 50 °C; the residual solvent signal was used as the internal standard.

**Single-crystal XRD study.** Single-crystal X-ray diffraction experiment was carried out on Agilent Technologies «SuperNova» diffractometers with monochromated CuK $\alpha$  radiation. Crystals were kept at 100(2) K during data collection. Structure have been solved by the Superflip,<sup>3</sup> and the ShelXT<sup>4</sup> structure solution programs using Charge Flipping and Intrinsic Phasing and refined by means of the ShelXL<sup>5</sup> program incorporated in the OLEX2<sup>6</sup> program package. The crystal data and details of structure refinements for **2a**(OTf)<sub>2</sub> are shown in Table S1. The structure can be obtained free of charge via the Cambridge Crystallographic Database (CCDC 2354600; <https://www.ccdc.cam.ac.uk/structures/>).

## <sup>1</sup>H NMR monitoring of the second step of the Groebke–Blackburn–Bienaymé reaction

The imine (86 mg, 0.439 mmol), cyclohexyl isocyanide (13.6  $\mu$ L, 0.110 mmol) and 1,4-dimethoxybenzene as the internal standard (15 mg, 0.110 mmol) were added to the CD<sub>3</sub>CN solution of **1a**(OTf)–**3**(OTf) (18.3 mM, 600  $\mu$ L, 0.011 mmol) and placed in an NMR tube. For the noncatalyzed reaction, the same quantities of the reactants were added to the CD<sub>3</sub>CN (600  $\mu$ L) and placed in an NMR tube. The NMR tube was sealed, and the obtained homogeneous solution was maintained at 50 °C for 16 h in an NMR spectrometer. The reaction was monitored by measuring the time-dependent integral density of the ipso-cyclohexyl proton group signals in isocyanide and in the product of the reaction.

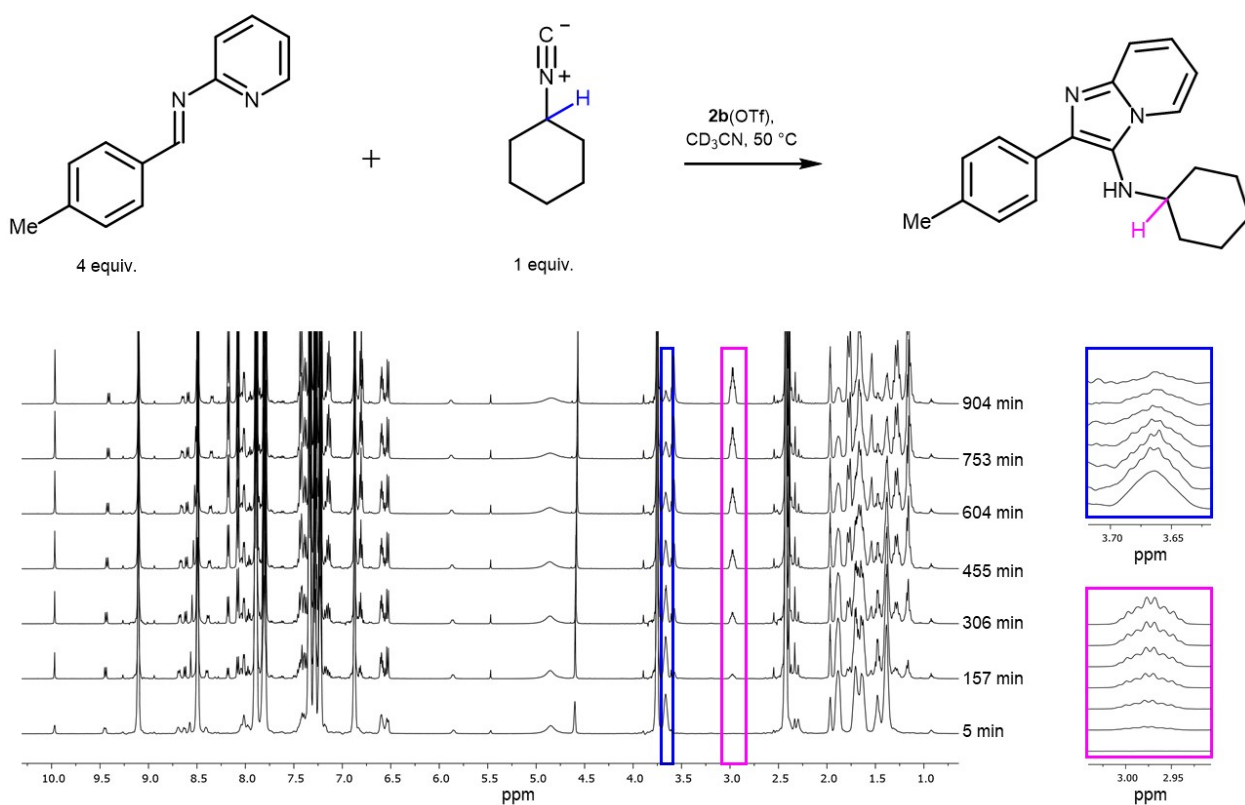

**Figure S1.** <sup>1</sup>H NMR spectra of the monitoring second step of reaction with **2b**(OTf) at the different time intervals.

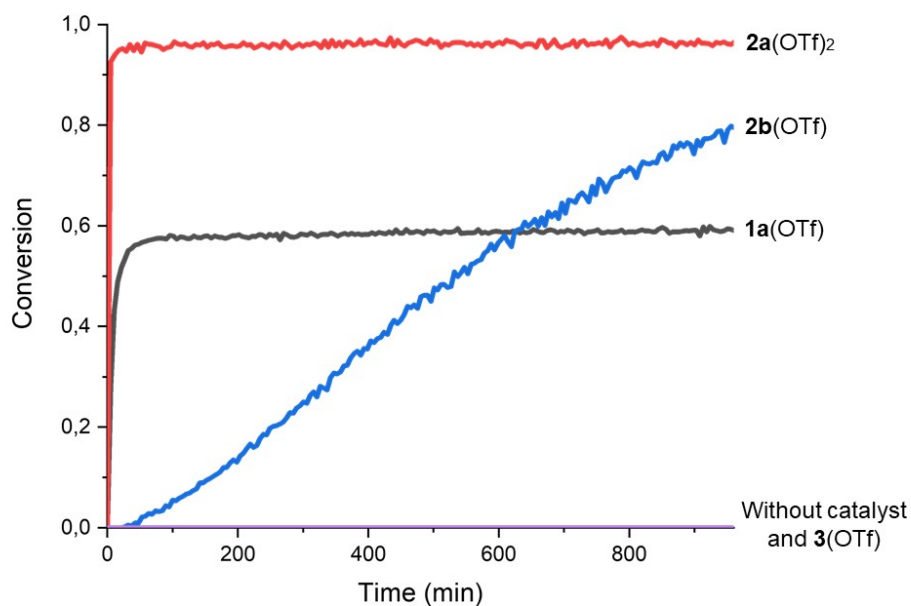

**Figure S2.**  $^1\text{H}$  NMR monitoring of the progress of the second step of the model Groebke–Blackburn–Bienaymé reaction.

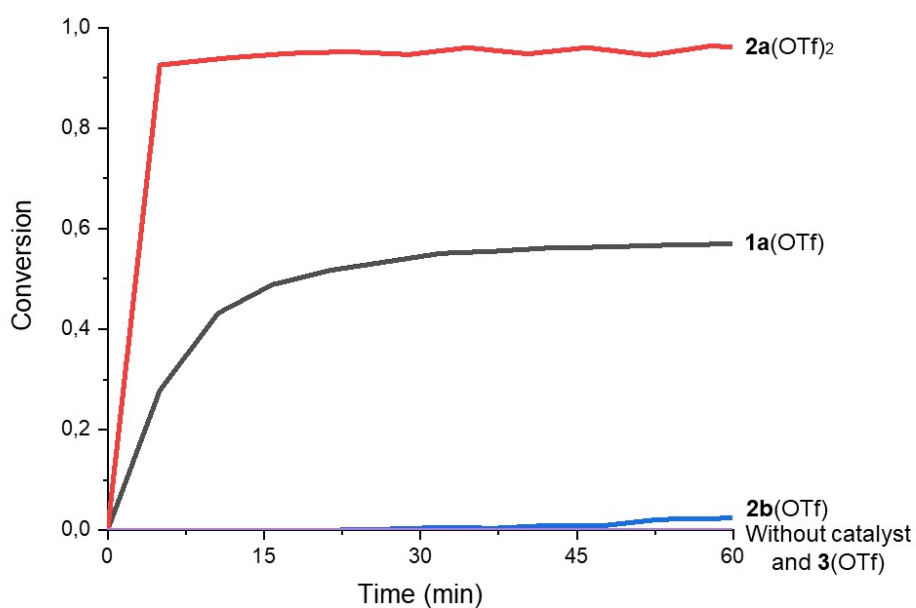

**Figure S3.**  $^1\text{H}$  NMR monitoring of the progress of the second step of the model Groebke–Blackburn–Bienaymé reaction within the first 60 minutes.

## Synthesis and characterization of 1a(OTf) and 1b

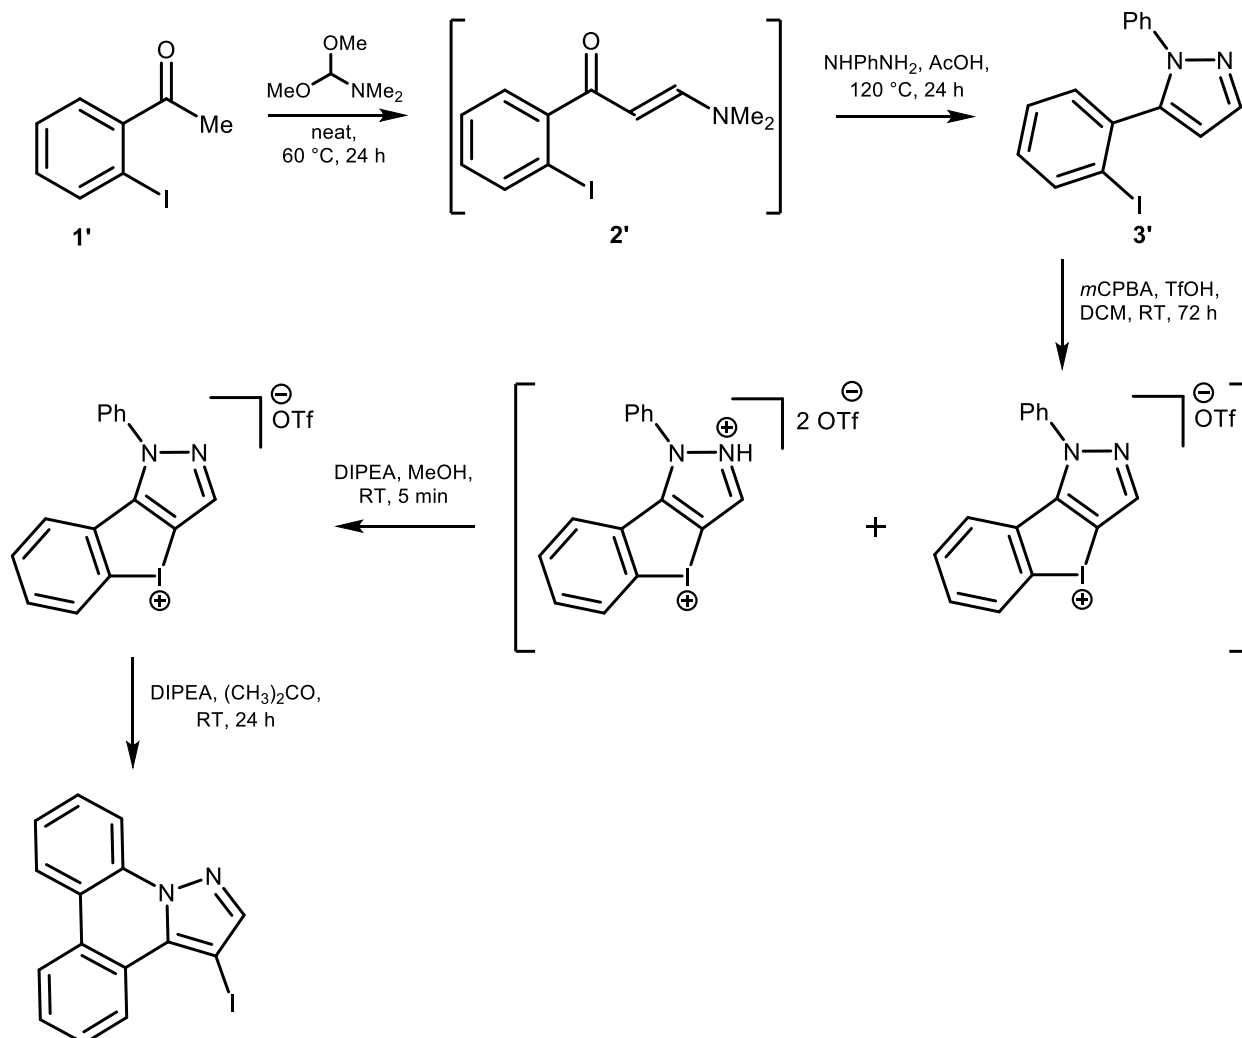

Corresponded compound was synthesized according to a previously published procedure,<sup>1, 2</sup> with some modifications. 2-Iodoacetophenone (1.00 g; 4.066 mmol) was dissolved in dimethylformamide-dimethylacetal (0.968 g; 8.132 mmol) and stirred at 60 °C for 24 h. After that solution was evaporated *in vacuo* at 60 °C and the residue was dissolved in the solution of relevant hydrazine (4.472 mmol) in 3 mL acetic acid and stirred at 120 °C for 24 h. After that the solvent was evaporated *in vacuo* at 75 °C, and the corresponding pyrazoles was isolated *via* column chromatography (eluent: hexane/EtOAc 9:1). The residue was dissolved in the solution of triflic acid (3 equiv.) and *m*-CPBA (1.5 equiv.) in 30 mL of dry dichloromethane. The resulting solution was stirred at RT for 72 h. After that the solvent was evaporated *in vacuo* at 50 °C, and the residue was crystallized using diethyl ether. After that the residue was added to the solution of diisopropylethylamine (1 equiv.) in MeOH (5 mL). The resulting solution was stirred at RT for 5 min and then the solvent was evaporated *in*

*vacuo* at 50 °C and the residue was crystallized using EtOAc, filtered and dried *in vacuo* at 50 °C. Compound **1a**(OTf) (0.090 g; 0.1822 mmol), obtained according to the procedure described above, was dissolved in the solution of diisopropylethylamine (0.0235 g; 0.1822 mmol) in 2 mL of acetone and stirred at RT for 24 h. After that the solvent was evaporated *in vacuo* at 50 °C, and the corresponding compound was isolated *via* column chromatography (eluent: hexane/EtOAc 95:5).

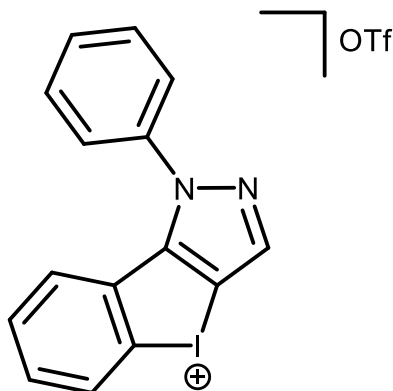

**1a**(OTf). Overall yield: 28% (560 mg). M.p.: 220–224 °C (decomp.). <sup>1</sup>H NMR (400.13 MHz, DMSO-*d*<sub>6</sub>) δ = 8.32 (d, <sup>3</sup>*J*<sub>HH</sub> = 7.9 Hz, 1H, Ar), 8.19 (s, 1H, Ar), 7.71–7.60 (m, 7H, Ar), 7.24 (dd, <sup>3</sup>*J*<sub>HH</sub> = 7.5 Hz, <sup>4</sup>*J*<sub>HH</sub> = 1.8 Hz, 1H, Ar). <sup>13</sup>C{<sup>1</sup>H} NMR (101.61 MHz, DMSO-*d*<sub>6</sub>) δ = 148.4, 139.3, 139.2, 132.0, 131.1, 131.0, 130.9, 130.5, 128.5, 127.2, 126.9, 125.8, and 95.1 (Ar). HRMS (ESI) *m/z*: [M]<sup>+</sup> Calcd for C<sub>15</sub>H<sub>10</sub>N<sub>2</sub>I 344.9889; Found 344.9883.

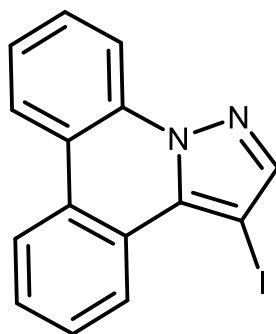

**1b**. Yield: 47% (42 mg). M.p.: 136–140 °C. <sup>1</sup>H NMR (400.13 MHz, CDCl<sub>3</sub>) δ = 9.30–9.27 (m, 1H, Ar), 8.60 (d, <sup>3</sup>*J*<sub>HH</sub> = 8.9 Hz, 1H, Ar), 8.46–8.40 (m, 2H, Ar), 8.03 (s, 1H, Ar), 7.71–7.65 (m, 3H, Ar), 7.54 (t, <sup>3</sup>*J*<sub>HH</sub> = 8.2 Hz, 1H, Ar). <sup>13</sup>C{<sup>1</sup>H} NMR (101.61 MHz, CDCl<sub>3</sub>) δ = 147.7, 133.8, 133.7, 129.4, 128.8, 127.7, 127.4, 125.5, 124.0, 123.3, 122.8, 121.3, and 116.2 (Ar); 50.6 (C–I). HRMS (ESI) *m/z*: [M + H]<sup>+</sup> Calcd for C<sub>15</sub>H<sub>10</sub>N<sub>2</sub>I 344.9884; Found 344.9882.

### Synthesis and characterization of **2a**(OTf)<sub>2</sub>–**2b**(OTf)

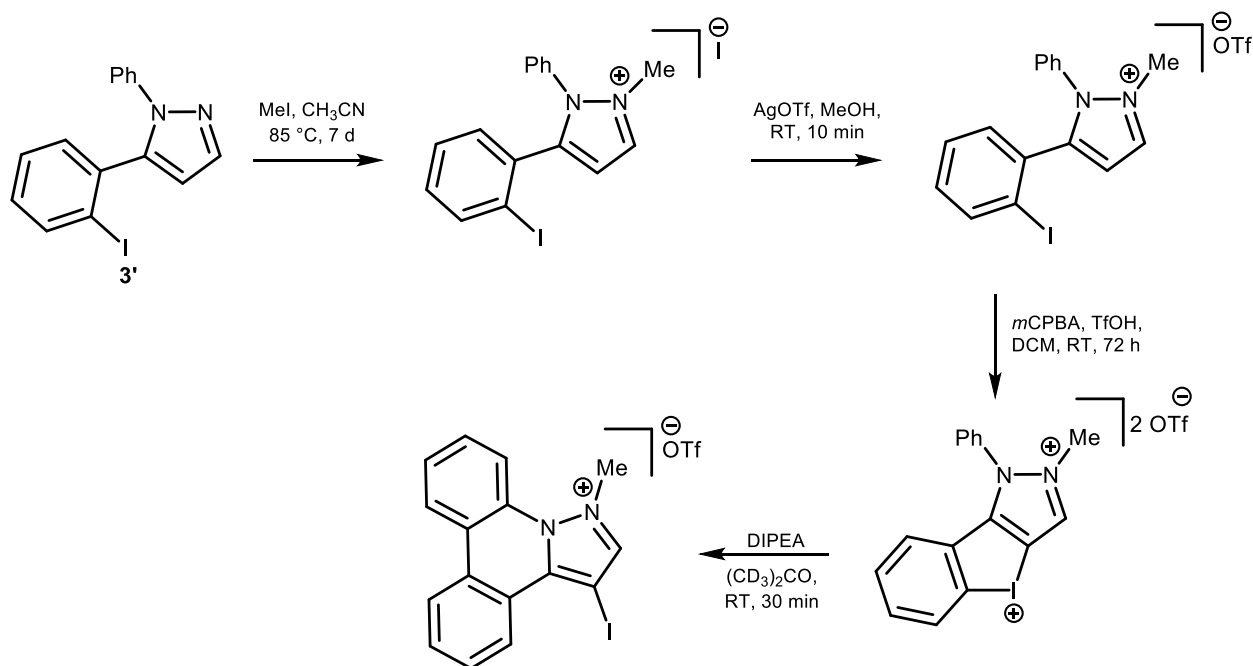

Compound **3'** (0.158 g; 0.4561 mmol), obtained according to the procedure described above, was dissolved in the solution of methyl iodide (0.648 g; 4.561 mmol) in 2 mL of acetonitrile and stirred at 85 °C for 7 days. After that solution was evaporated *in vacuo* at 60 °C. The solution of silver triflate (0.132 g, 0.512 mmol) in 1 mL of methanol were added to a stirred solution of the residue in 1 mL methanol and stirred for 10 min at RT. The precipitate which formed was filtered, dried *in vacuo* at 50 °C and dissolved in the solution of triflic acid (0.114 mL, 3 equiv.) and *m*-CPBA (0.145 g, 0.647 mmol, 1.5 equiv.) in 3 mL of dry dichloromethane. The resulting solution was stirred at RT for 72 h. After that the solvent was evaporated *in vacuo* at 50 °C, and the residue was crystallized using diethyl ether, filtered off, washed with Et<sub>2</sub>O (2 mL), and dried at 50 °C *in vacuo*. Compound **2a**(OTf)<sub>2</sub> (0.041 g; 0.0623 mmol), obtained according to the procedure described above, was dissolved in the solution of diisopropylethylamine (0.008 g; 0.0623 mmol) in 1 mL of acetone and stirred at RT for 30 min. After that the solvent was evaporated *in vacuo* at 50 °C, and the residue was crystallized using ethyl acetate, filtered off, washed with EtOAc (1 mL), and dried at 50 °C *in vacuo*.

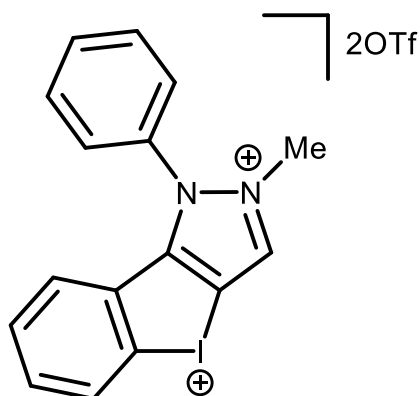

**2a(OTf)<sub>2</sub>**. Yield: 76% (229 mg). M.p.: 250–252 °C. <sup>1</sup>H NMR (400.13 MHz, (CD<sub>3</sub>)<sub>2</sub>CO) δ = 9.25 (s, 1H, Ar), 8.56 (d, <sup>3</sup>J<sub>HH</sub> = 8.5 Hz, 1H, Ar), 8.17–8.14 (m, 2H, Ar), 8.12–8.08 (m, 1H, Ar), 8.04–8.00 (m, 2H, Ar), 7.96–7.91 (m, 1H, Ar), 7.82–7.78 (m, 1H, Ar), 7.13 (dd, <sup>3</sup>J<sub>HH</sub> = 7.9 Hz, <sup>4</sup>J<sub>HH</sub> = 1.4 Hz, 1H, Ar), 4.39 (s, 3H, CH<sub>3</sub>). <sup>13</sup>C{<sup>1</sup>H} NMR (101.61 MHz, (CD<sub>3</sub>)<sub>2</sub>CO) δ = 153.0, 139.3, 134.5, 131.8, 131.7, 131.0, 129.0, 128.0, 127.5, 127.3 and 93.0 (Ar); 68.4 (C–I); 38.8 (CH<sub>3</sub>). HRMS (ESI) m/z: [M]<sup>2+</sup> Calcd for C<sub>16</sub>H<sub>13</sub>N<sub>2</sub>I 180.0056; Found 180.0062.

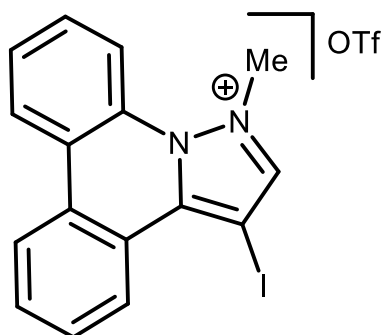

**2b(OTf)**. Yield: 56% (22.7 mg). M.p.: 253–257 °C (decomp.). <sup>1</sup>H NMR (400.13 MHz, (CD<sub>3</sub>)<sub>2</sub>CO) δ = 9.69 (d, <sup>3</sup>J<sub>HH</sub> = 9.0 Hz, 1H, Ar), 9.29 (s, 1H, Ar), 9.05–9.03 (m, 1H, Ar), 8.98 (d, <sup>3</sup>J<sub>HH</sub> = 8.2 Hz, 1H, Ar), 8.93–8.91 (m, 1H, Ar), 8.16–8.12 (m, 1H, Ar), 8.09–7.99 (m, 3H, Ar), 4.39 (s, 3H, CH<sub>3</sub>). <sup>13</sup>C{<sup>1</sup>H} NMR (101.61 MHz, (CD<sub>3</sub>)<sub>2</sub>CO) δ = 149.1, 139.1, 133.0, 130.4, 130.2, 129.9, 129.1, 129.0, 125.7, 125.1, 124.4, 123.8, 121.9 and 118.3 (Ar); 56.3 (C–I); 44.9 (CH<sub>3</sub>). HRMS (ESI) m/z: [M]<sup>+</sup> Calcd for C<sub>16</sub>H<sub>12</sub>N<sub>2</sub>I 359.040; Found 359.0040.



## Synthesis and characterization of 3(OTf)

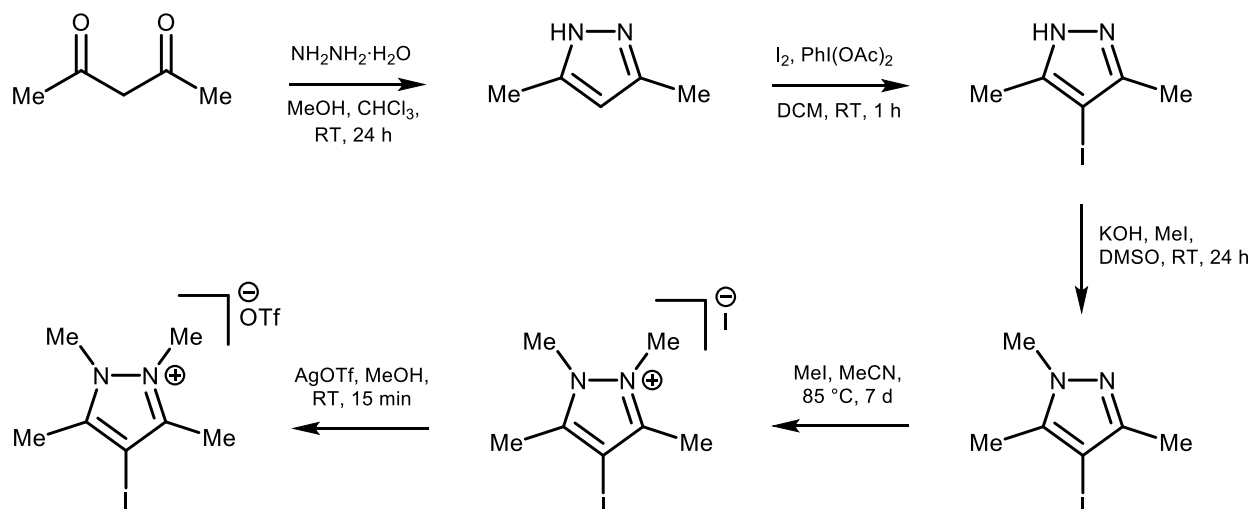

Corresponded compound was synthesized according to a previously published procedure.<sup>7</sup> A solution of hydrazine hydrate (1293  $\mu\text{L}$ , 22.5 mmol) in MeOH (10 mL) was added to a stirred solution of one of the desired 1,3-diketones (15 mmol) in  $\text{CHCl}_3$  (10 mL). The resulting solution was stirred overnight at RT. The solvent was evaporated *in vacuo* at  $50^\circ\text{C}$ , and the residue was crystallized using hexane (5 mL). The precipitate was filtered off, washed with hexane (10 mL), dried at  $50^\circ\text{C}$  for 2 h in air, and used without additional purification. A solution of the corresponding pyrazole (7 mmol) in  $\text{CH}_2\text{Cl}_2$  (5 mL) was added to a stirred solution of  $\text{I}_2$  (1067 mg, 4.2 mmol) and  $\text{PhI}(\text{OAc})_2$  (1352 mg, 4.2 mmol) in  $\text{CH}_2\text{Cl}_2$  (5 mL). The resulting solution was stirred for 1 h at RT. The solvent was evaporated *in vacuo* at  $50^\circ\text{C}$ , and the corresponding 4-iodopyrazole was isolated *via* column chromatography (eluent: EtOAc : hexane = 1 : 1, v/v). A solution of the 4-iodopyrazole (2.5 mmol) in DMSO (2 mL) was added to a stirred solution of KOH (280 mg, 5 mmol) and MeI (233  $\mu\text{L}$ , 3.75 mmol) in DMSO (2 mL). The resulting solution was stirred overnight at RT, and then  $\text{H}_2\text{O}$  (100 mL) was added to the reaction mixture. The product was extracted with EtOAc (3  $\times$  50 mL). The combined organic layers were washed with brine (50 mL), and the organic layer was dried over  $\text{Na}_2\text{SO}_4$  and filtered from the inorganics. The solvent was evaporated *in vacuo* at  $50^\circ\text{C}$ , and the corresponding 1-methyl-4-iodopyrazole was used without additional purification. A solution of MeI (224  $\mu\text{L}$ , 3.6 mmol) in  $\text{CH}_3\text{CN}$  (1 mL) was added to a stirred solution of the corresponding 1-methyl-3-iodopyrazole (1.2 mmol) in  $\text{CH}_3\text{CN}$  (4 mL). The resulting solution was stirred for 7 d at  $85^\circ\text{C}$ , and the generated precipitate was filtered off, washed with  $\text{CH}_3\text{CN}$  (2  $\times$  3 mL) and  $\text{Et}_2\text{O}$  (1  $\times$  5 mL), and dried at  $50^\circ\text{C}$  for 2 h in air to give the corresponding 1,2-dimethyl-4-iodopyrazolium iodide, which was used without further purification. A solution of  $\text{AgOTf}$  (136 mg, 0.53 mmol) in MeOH (2 mL) was added to a stirred

solution of the corresponding 1,2-dimethyl-4-iodo-pyrazolium iodide (0.53 mmol) in MeOH (3 mL). The suspension was stirred for 15 min at RT, and the precipitate formed was filtered off, washed with MeOH (15 mL), and the combined organic layers were evaporated *in vacuo* at 40 °C. The residue was recrystallized from EtOAc (5 mL) to give **3**(OTf). Yields on the last synthetic step are reported below.

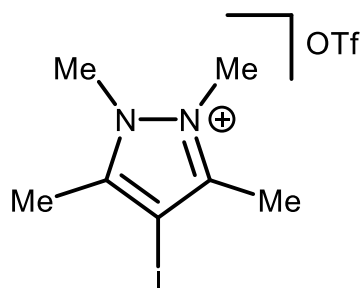

**3**(OTf): Yield: 83% (176 mg). M.p.: 159–161 °C. <sup>1</sup>H-NMR (400.13 MHz, CD<sub>3</sub>CN, ppm): δ = 3.93 (s, 6H, N-CH<sub>3</sub>), 2.46 (s, 6H, C-CH<sub>3</sub>). <sup>13</sup>C{<sup>1</sup>H}-NMR (101.61 MHz, CD<sub>3</sub>CN, ppm): δ = 148.05 (C-CH<sub>3</sub>), 121.01 (q, <sup>1</sup>J<sub>CF</sub> = 320.7 Hz, CF<sub>3</sub>), 65.56 (C-I), 35.06 (N-CH<sub>3</sub>), 12.95 (C-CH<sub>3</sub>). HRMS (ESI-TOF): *m/z* calcd for C<sub>7</sub>H<sub>12</sub>N<sub>2</sub>I<sup>+</sup>: 251.0040; found: 251.0042.

### Spectra of 1a(OTf)-3(OTf)

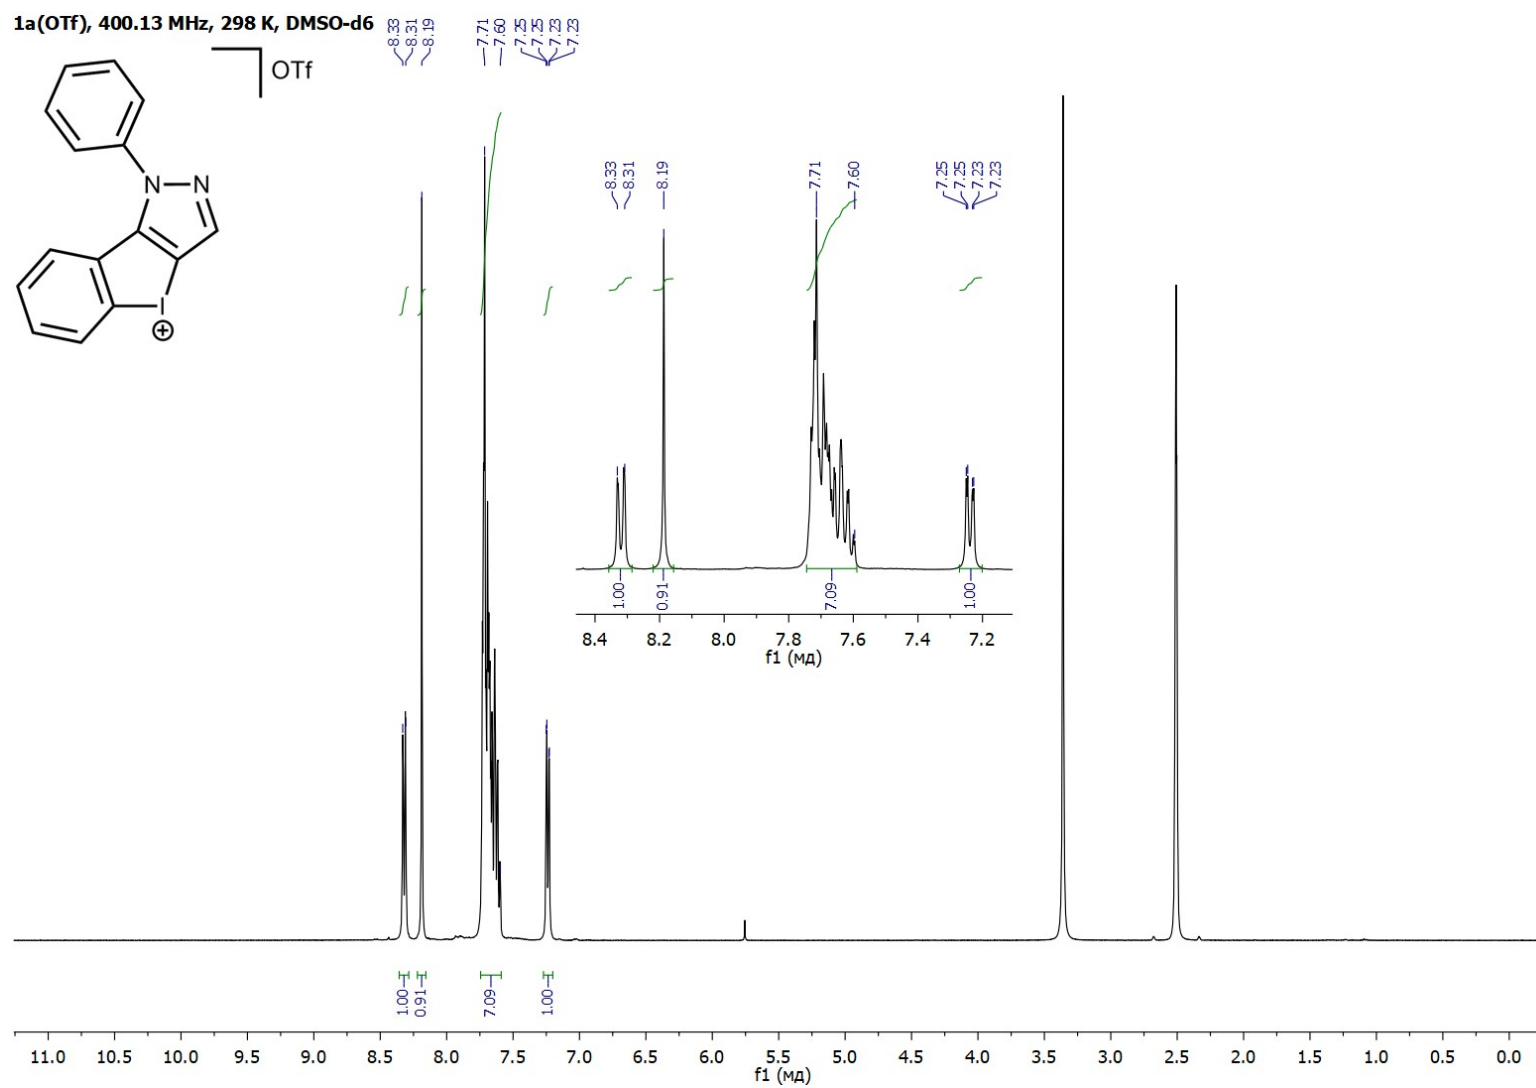

**Figure S4.** <sup>1</sup>H NMR spectrum of 1a(OTf).

1a(OTf), 100.61 MHz, 298 K, DMSO-d6

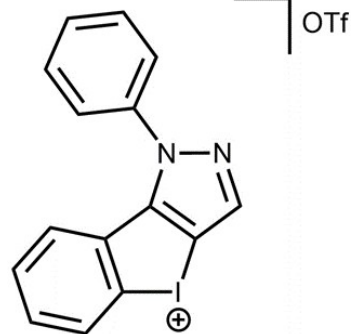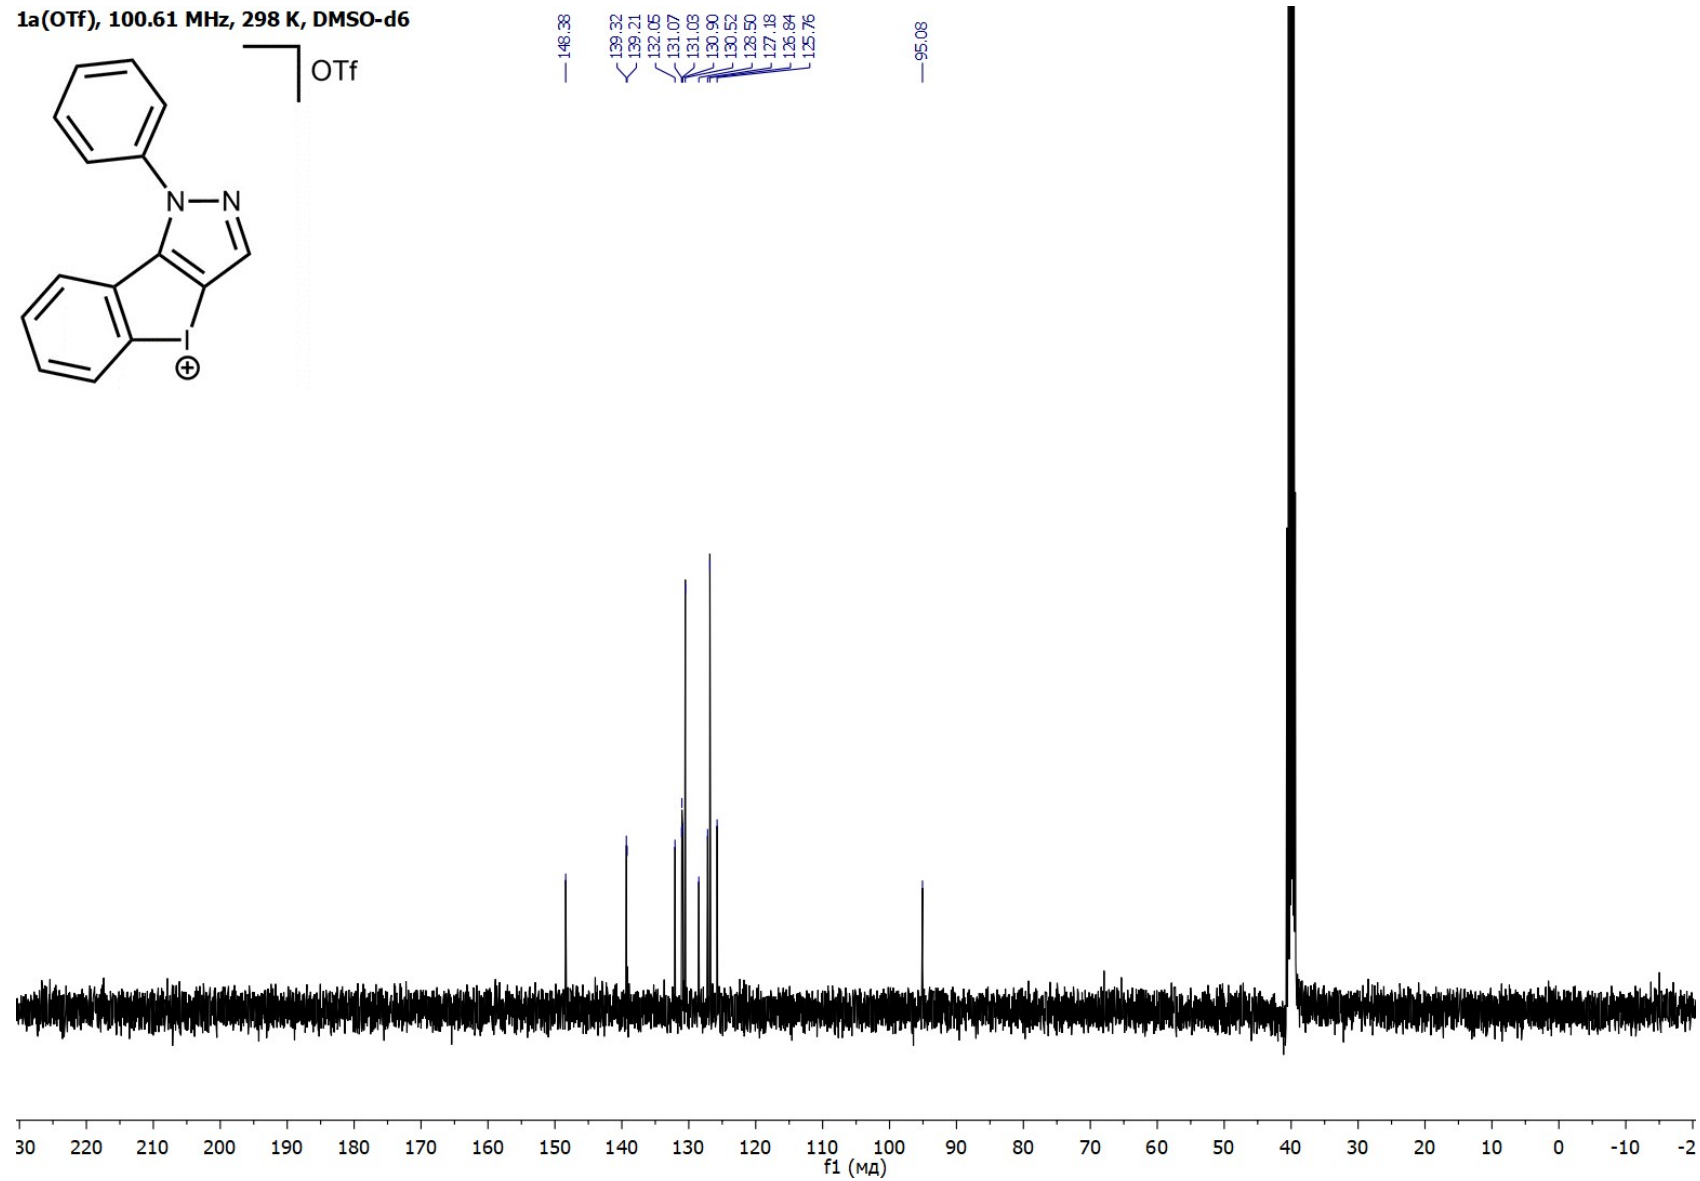

Figure S5. <sup>13</sup>C NMR spectrum of 1a(OTf).

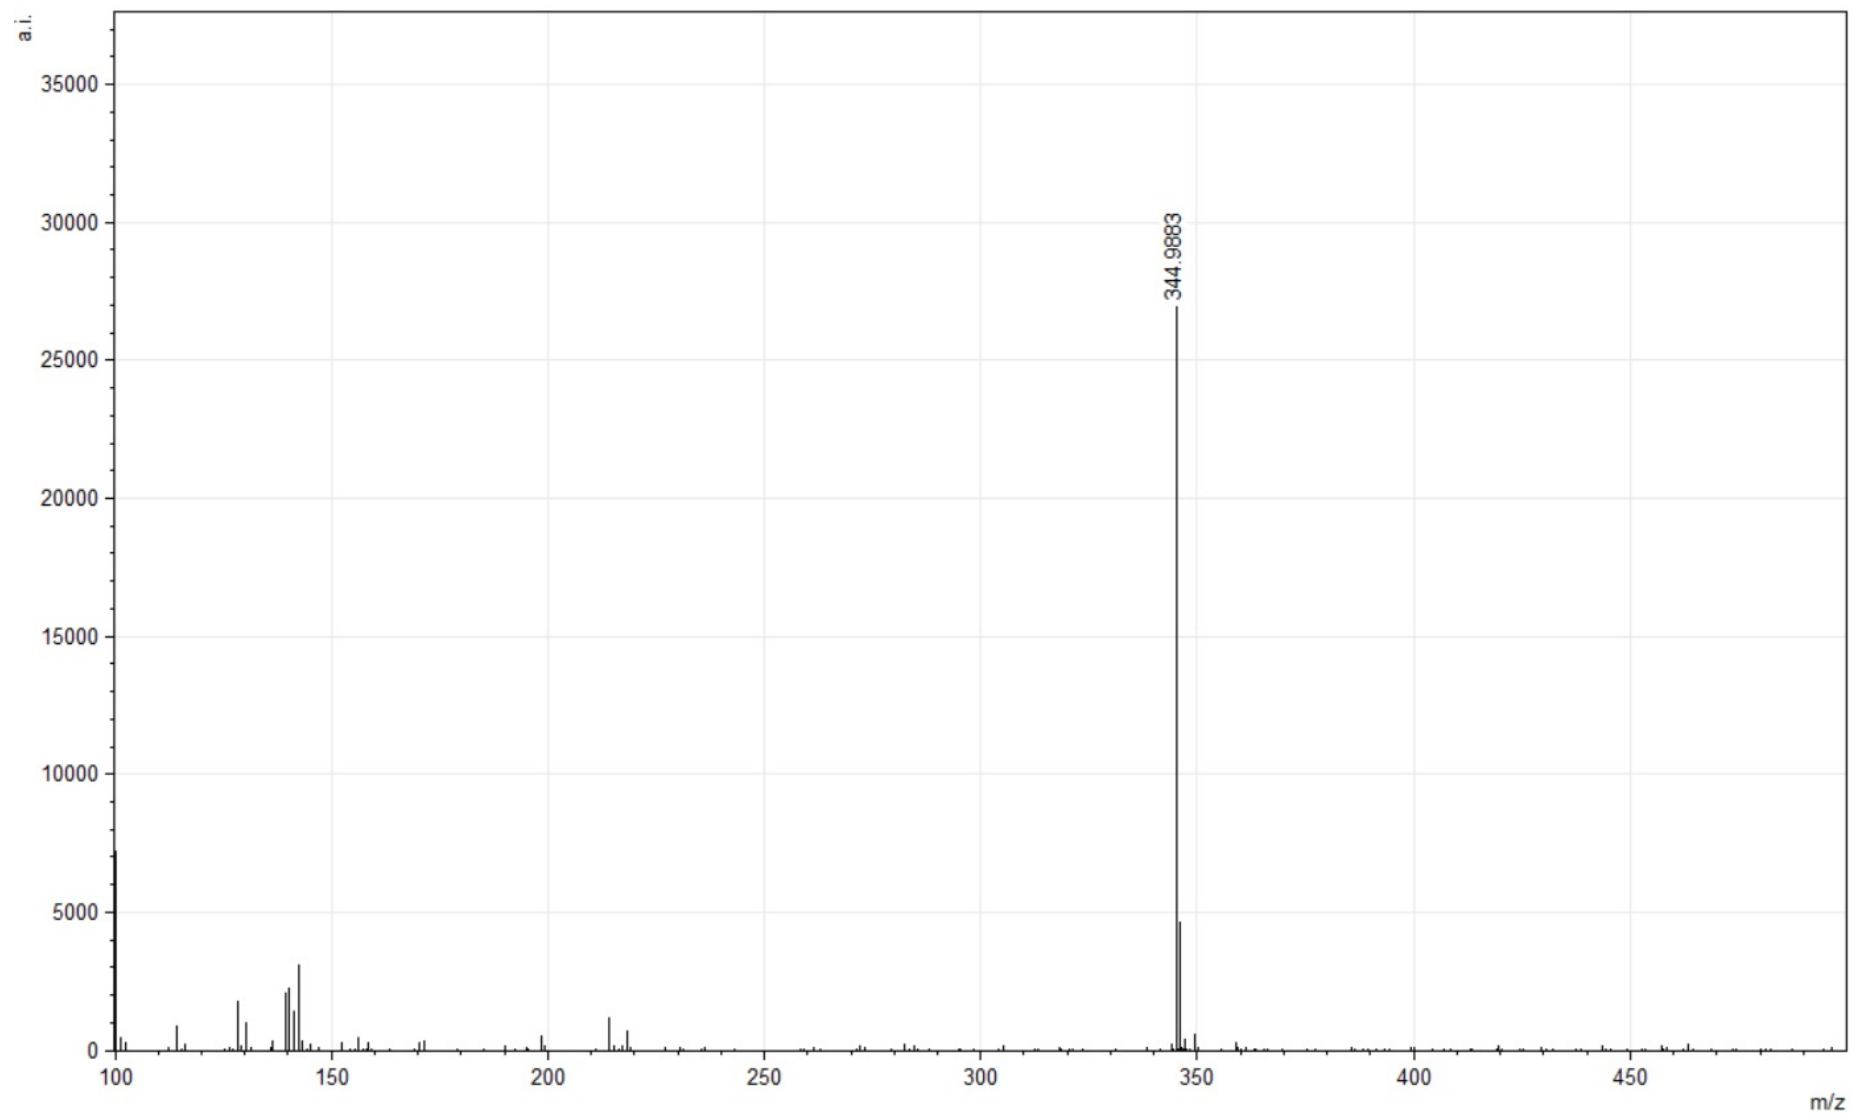

**Figure S6.** HRESI<sup>+</sup>-MS of **1a(OTf)**.

**1b**, 400.13 MHz, 298 K, CDCl<sub>3</sub>

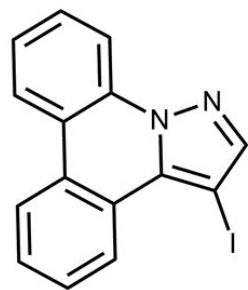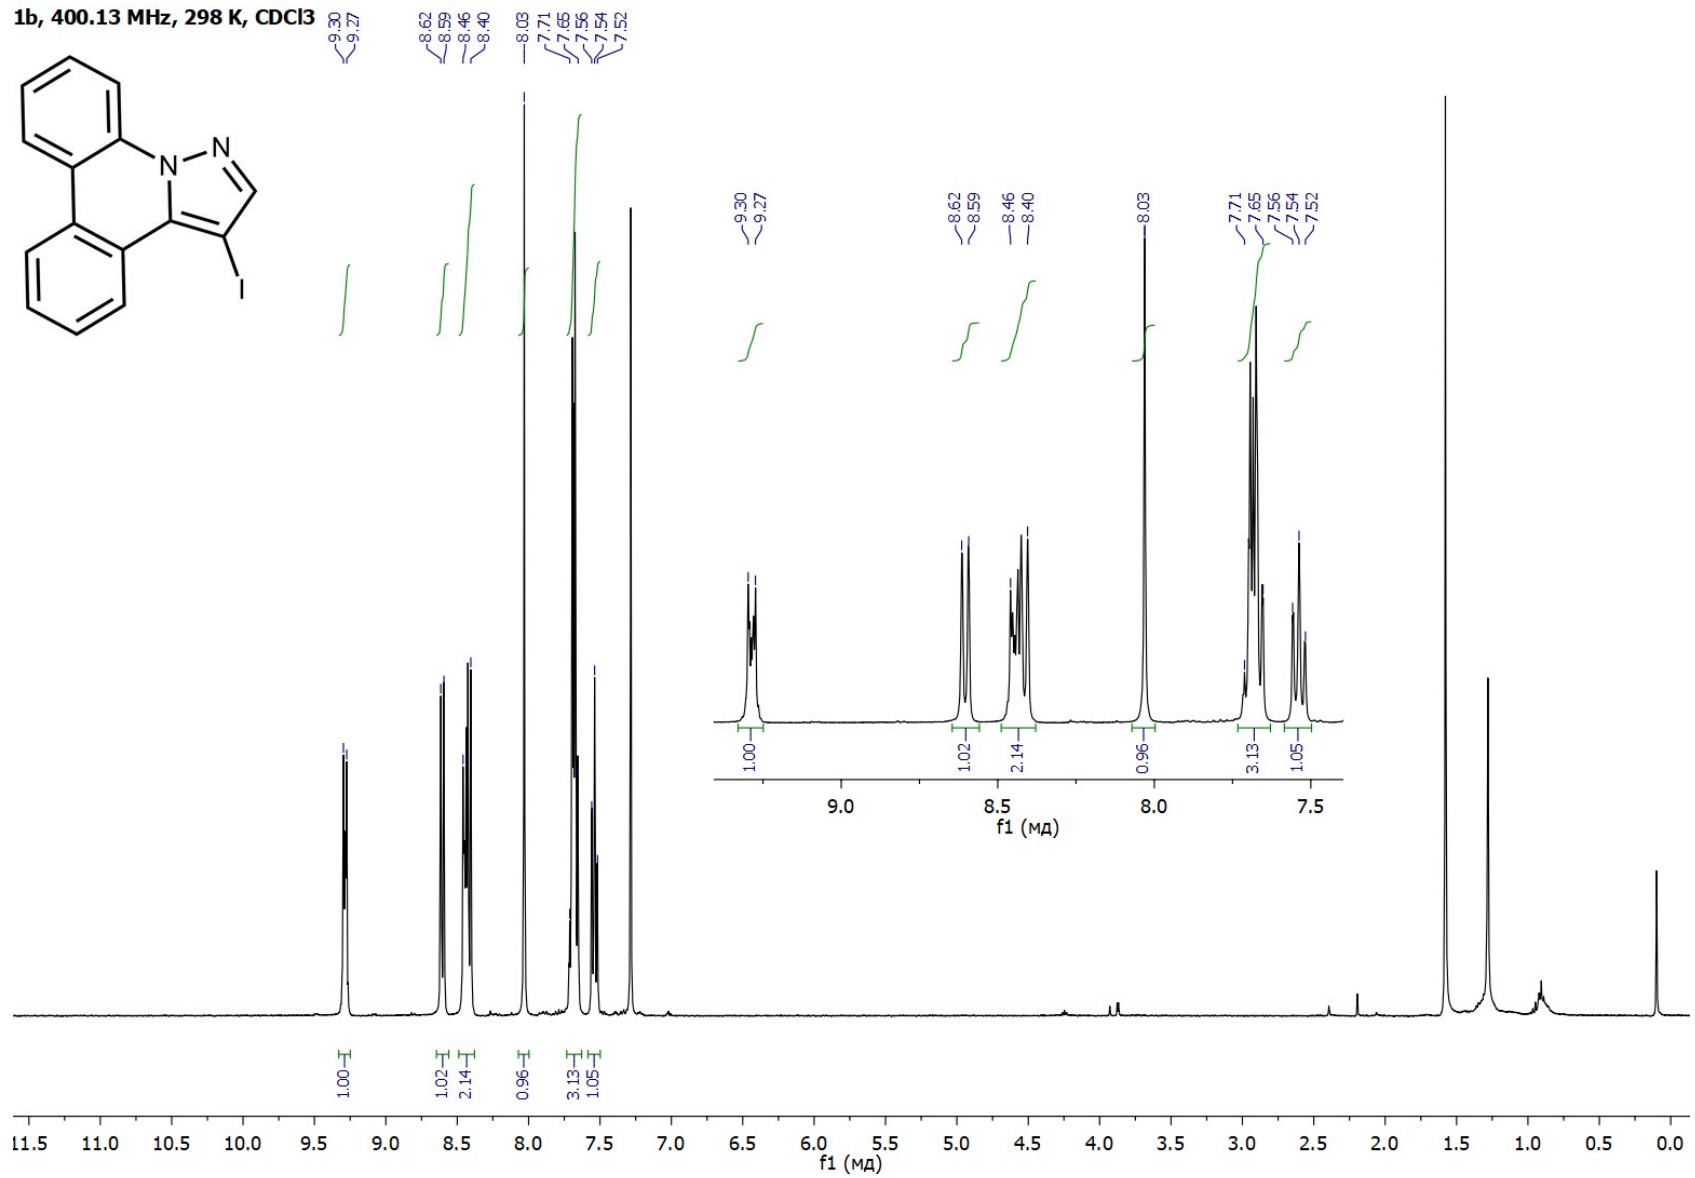

**Figure S7.** <sup>1</sup>H NMR spectrum of **1b**.

**1b, 100.61 MHz, 298 K, CDCl<sub>3</sub>**

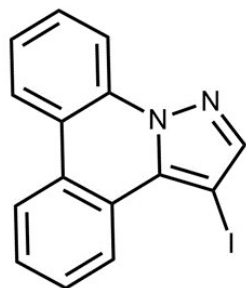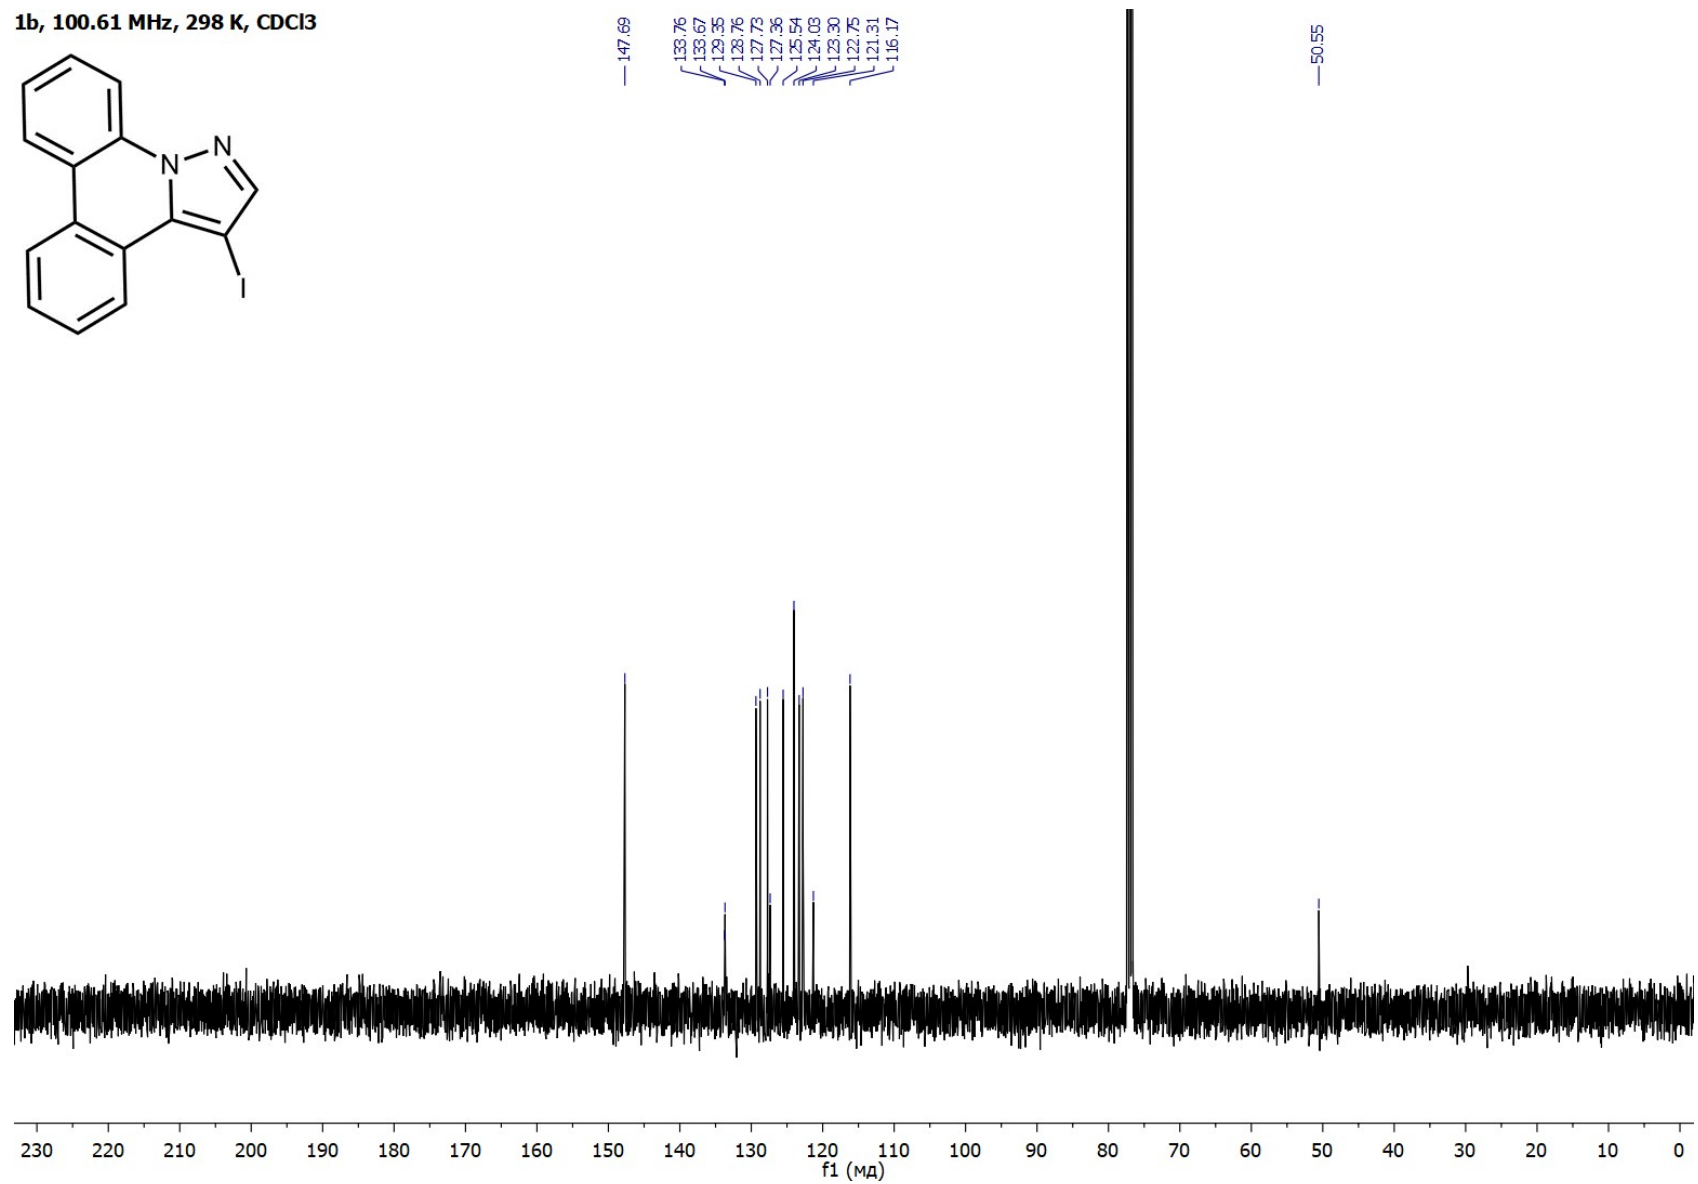

**Figure S8.** <sup>13</sup>C NMR spectrum of **1b**.

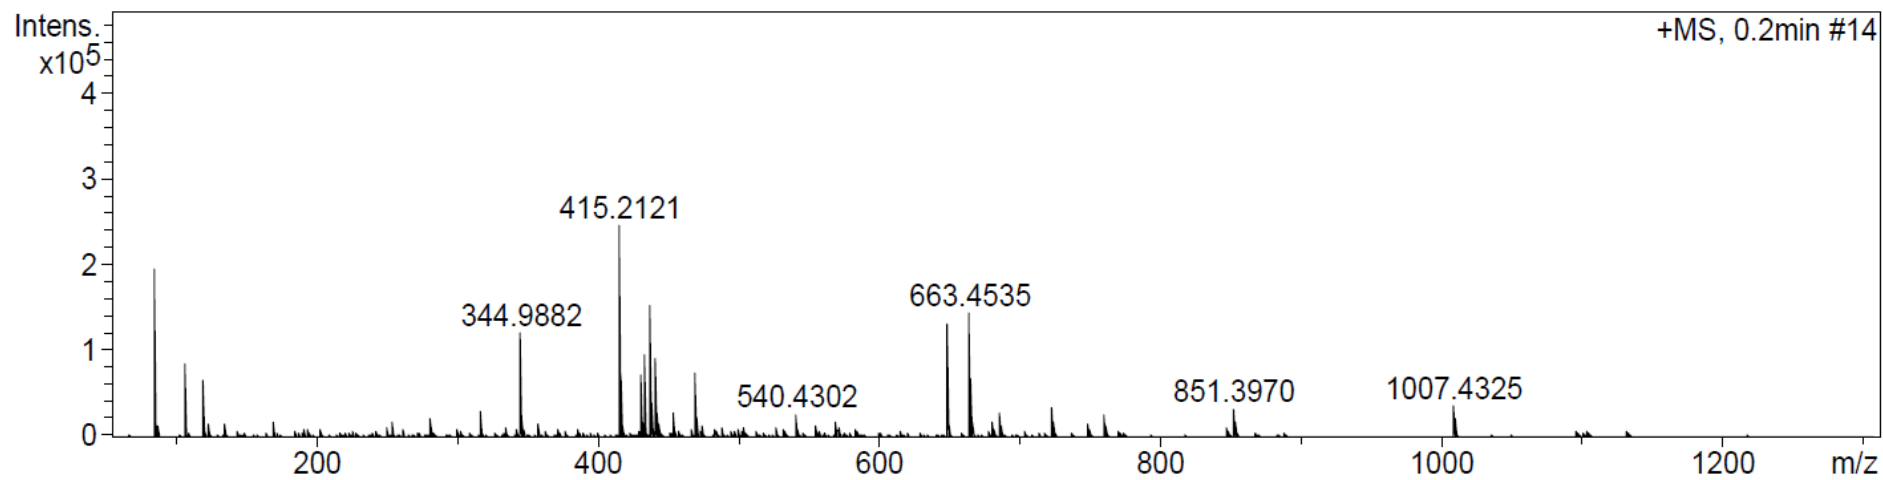

**Figure S9.** HRESI<sup>+</sup>-MS of **1b**.





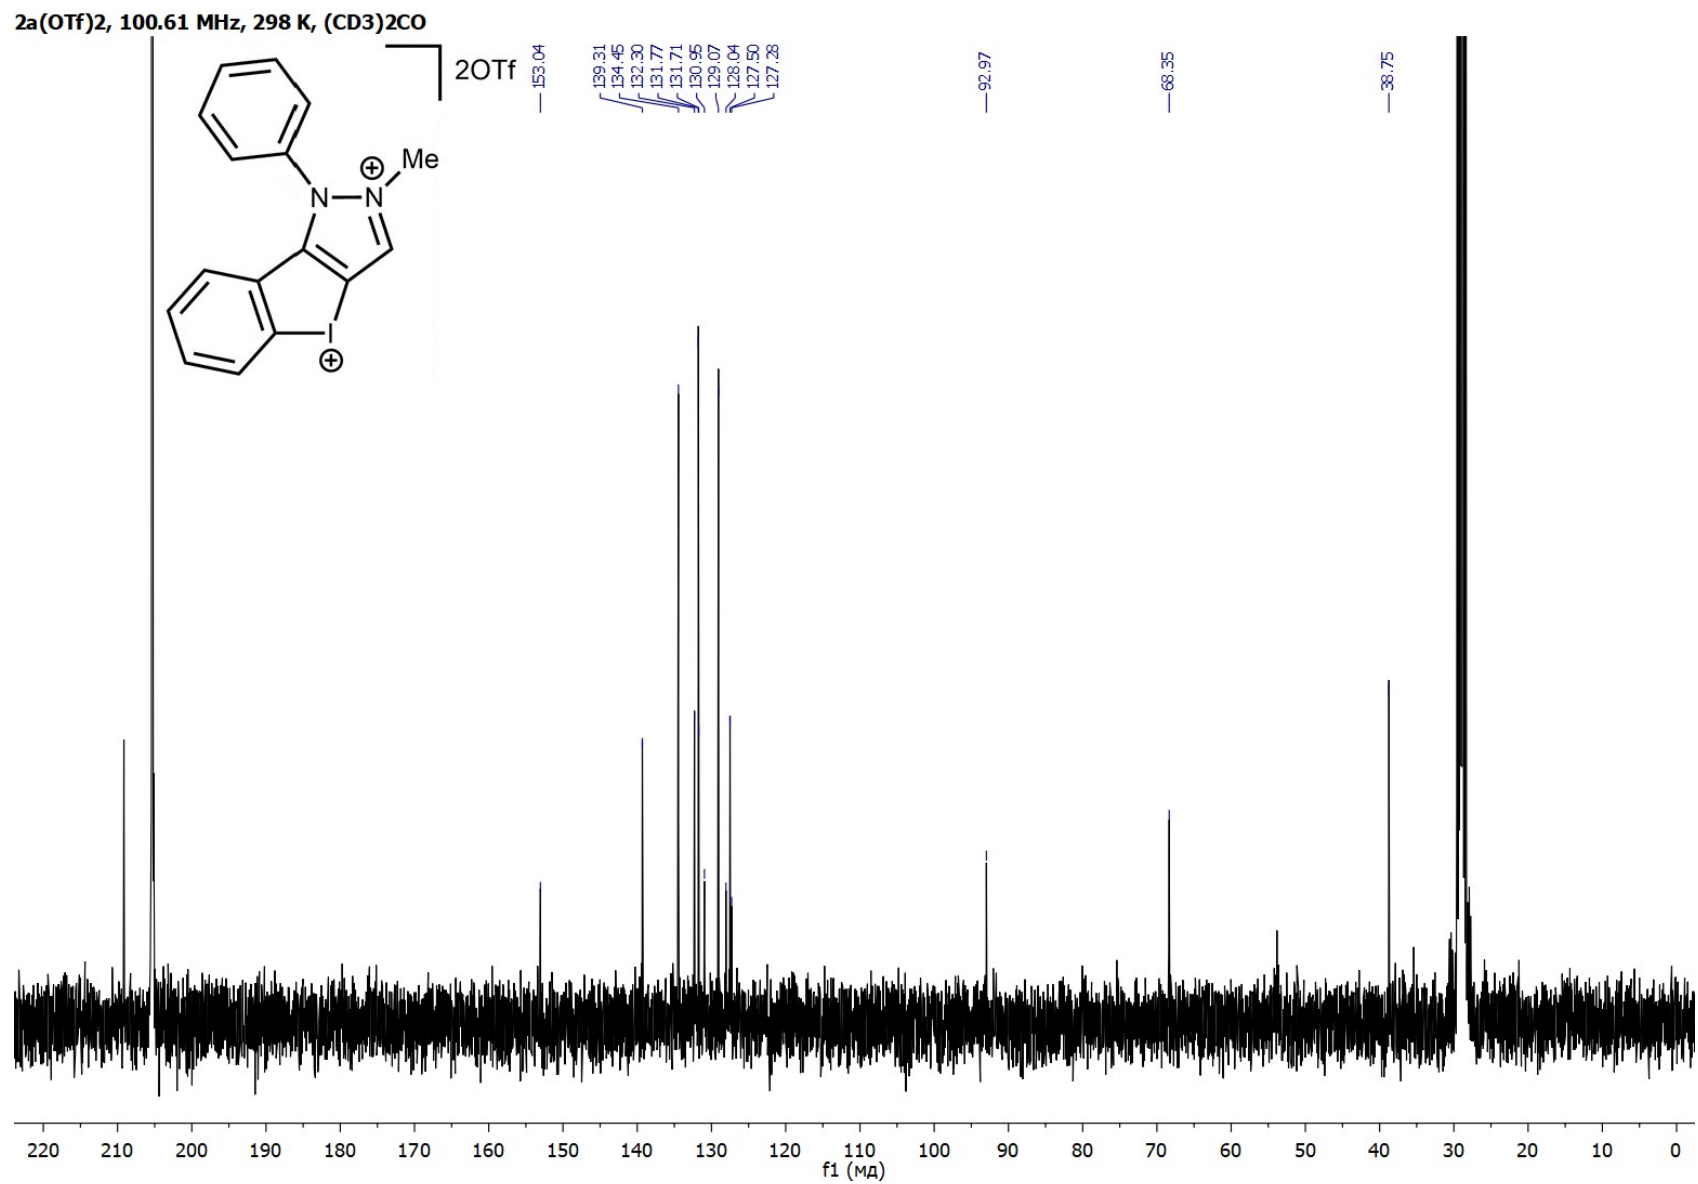

**Figure S11.** <sup>13</sup>C NMR spectrum of **2a(OTf)<sub>2</sub>**.

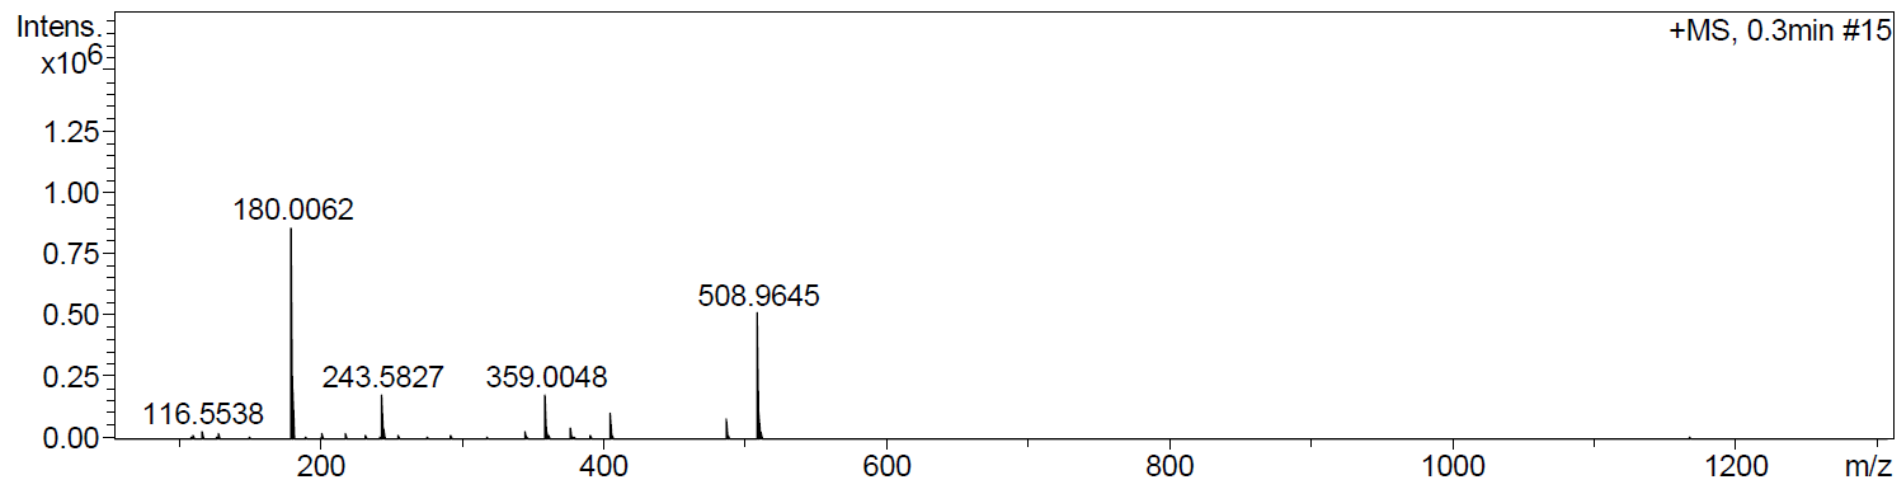

**Figure S12.** HRESI<sup>+</sup>-MS of **2a**(OTf)<sub>2</sub>.

2b(OTf), 400.13 MHz, 298 K, (CD<sub>3</sub>)<sub>2</sub>CO

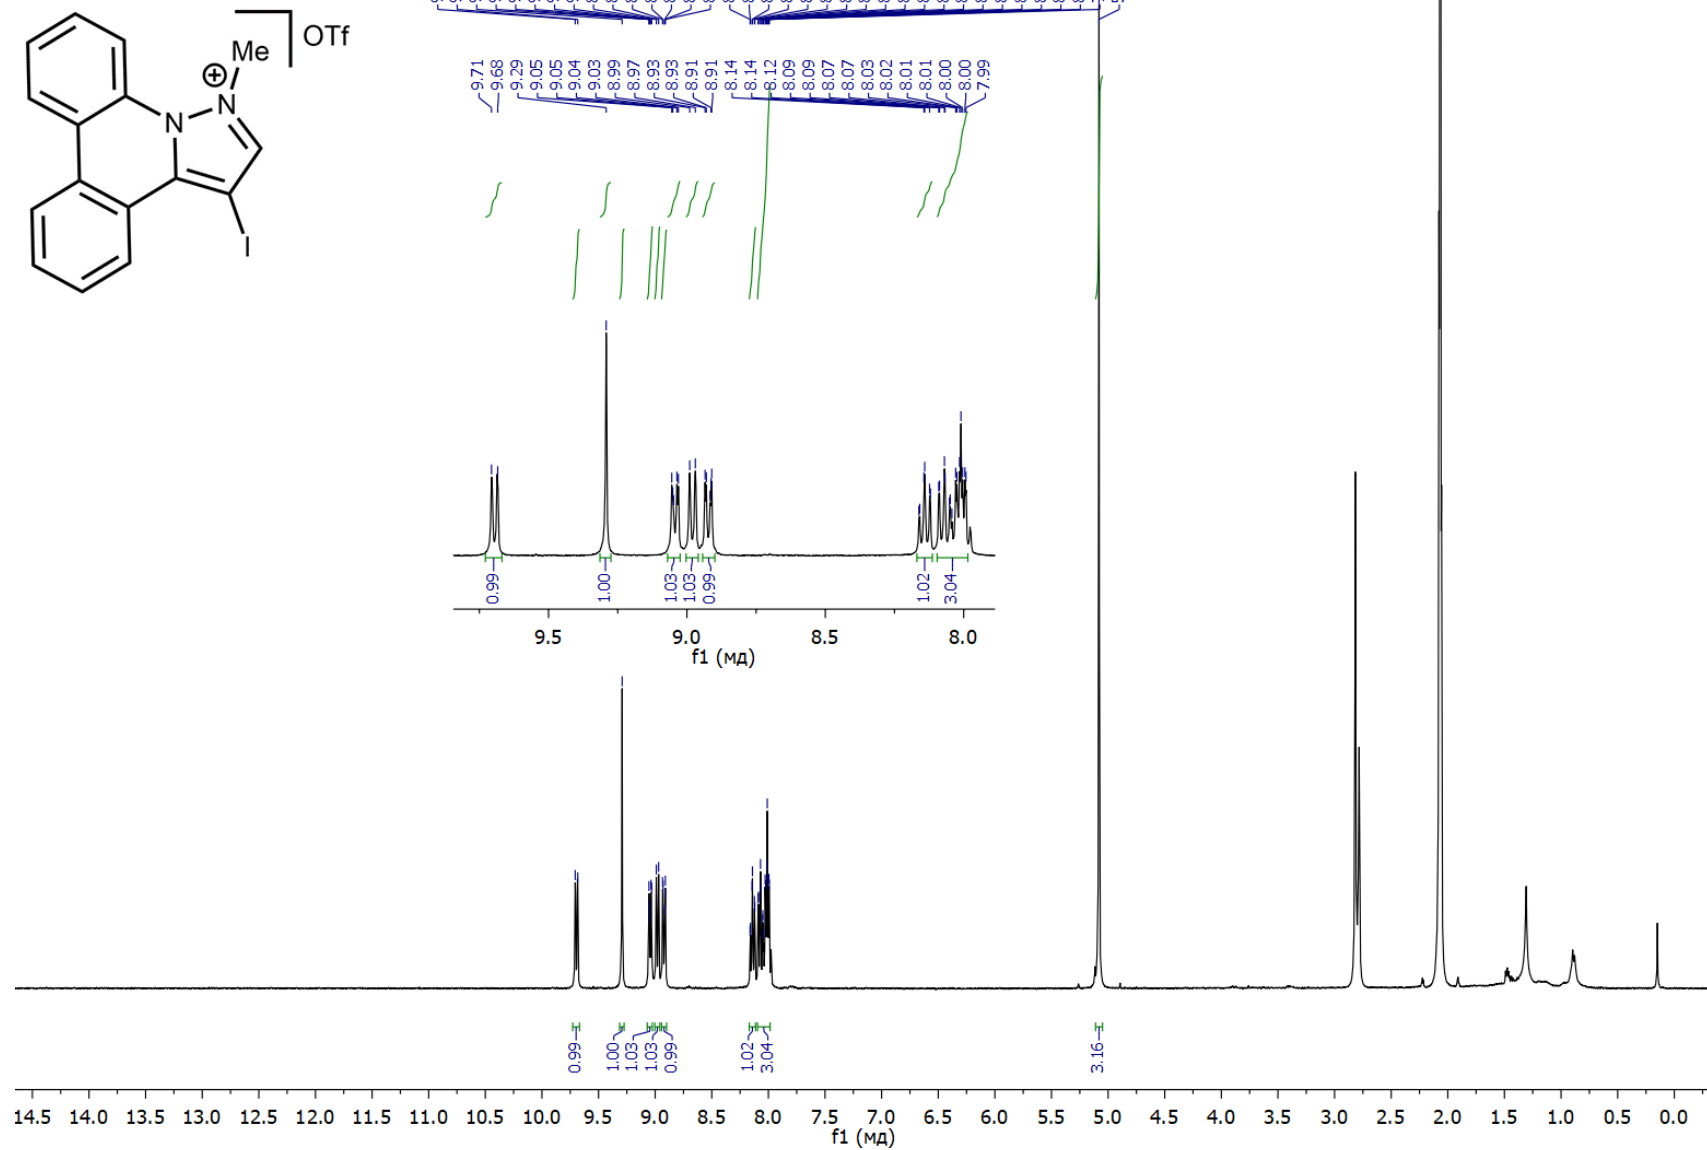

Figure S13. <sup>1</sup>H NMR spectrum of 2b(OTf).

2b(OTf), 100.61 MHz, 298 K, DMSO-d6

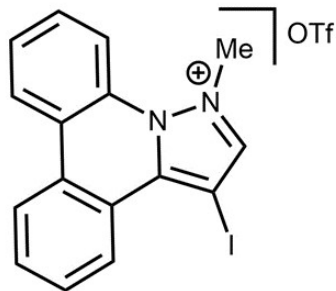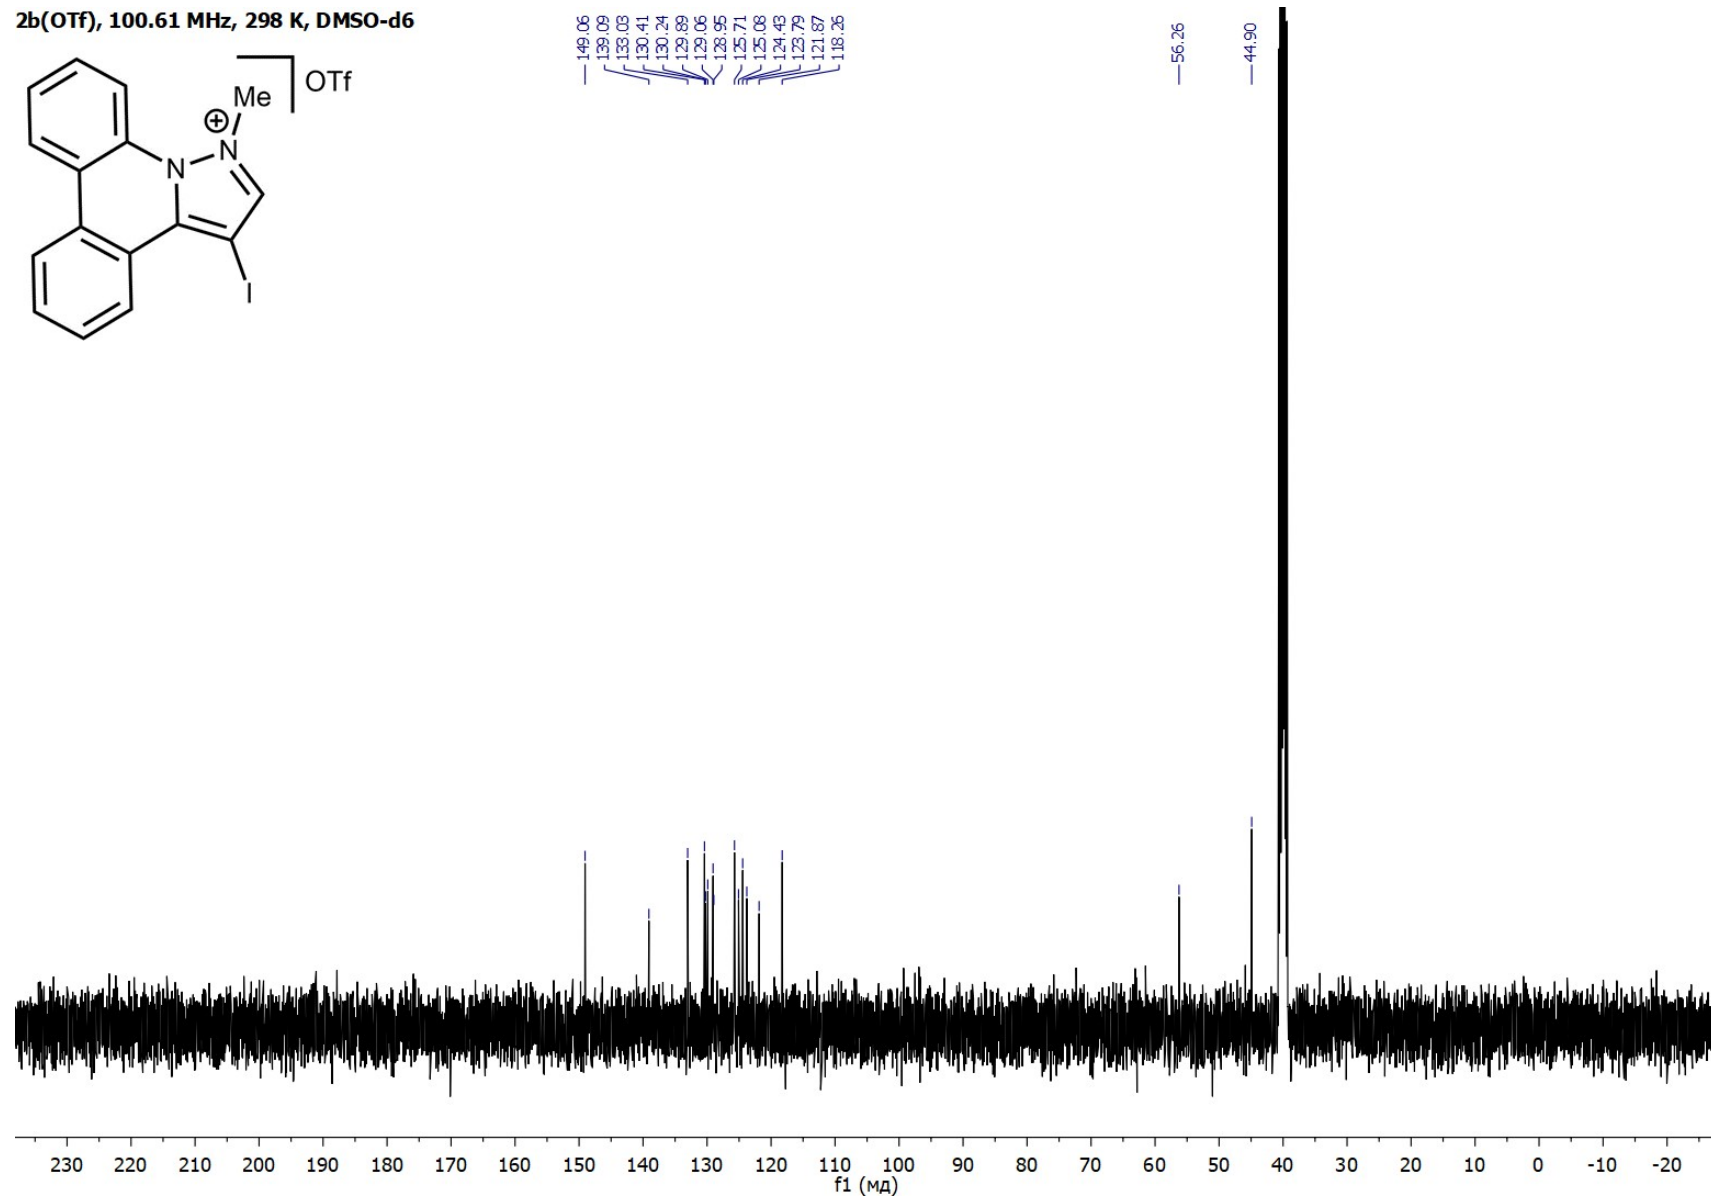

Figure S14. <sup>13</sup>C NMR spectrum of 2b(OTf).

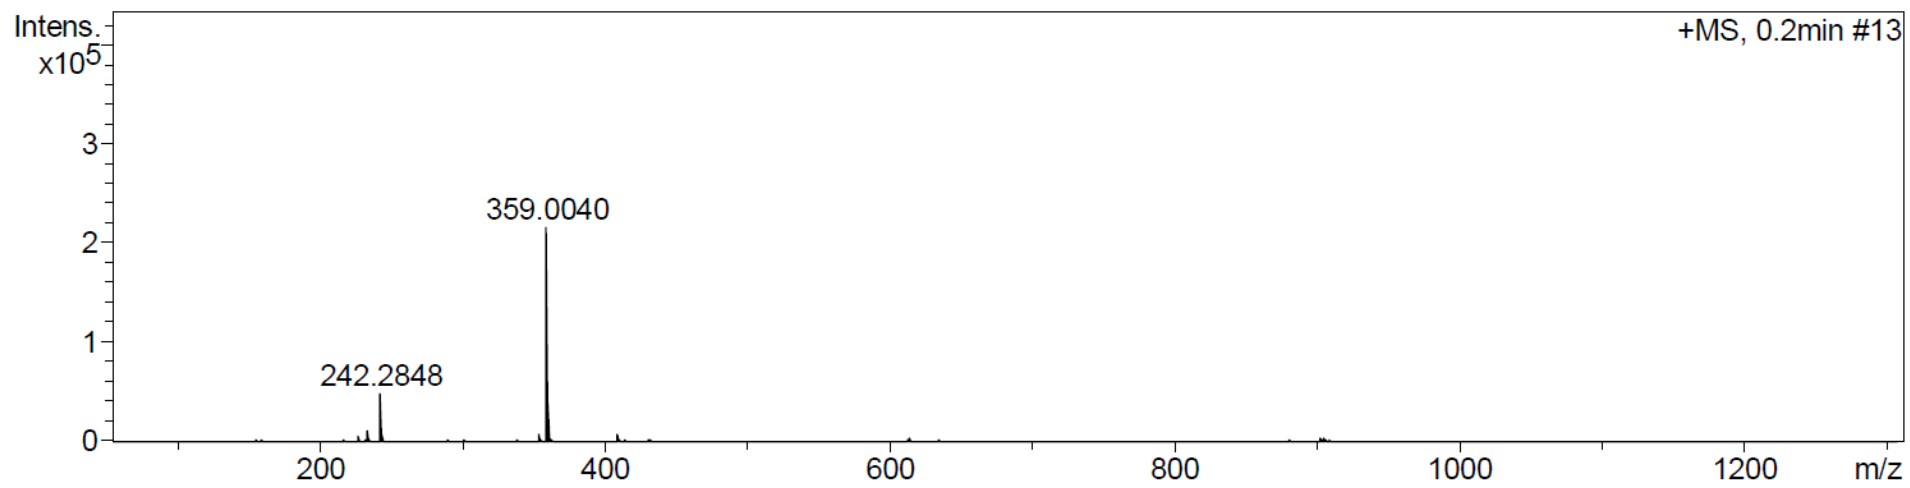

**Figure S15.** HRESI<sup>+</sup>-MS of **2b(OTf)**.

3(OTf), 400.13 MHz, 298 K

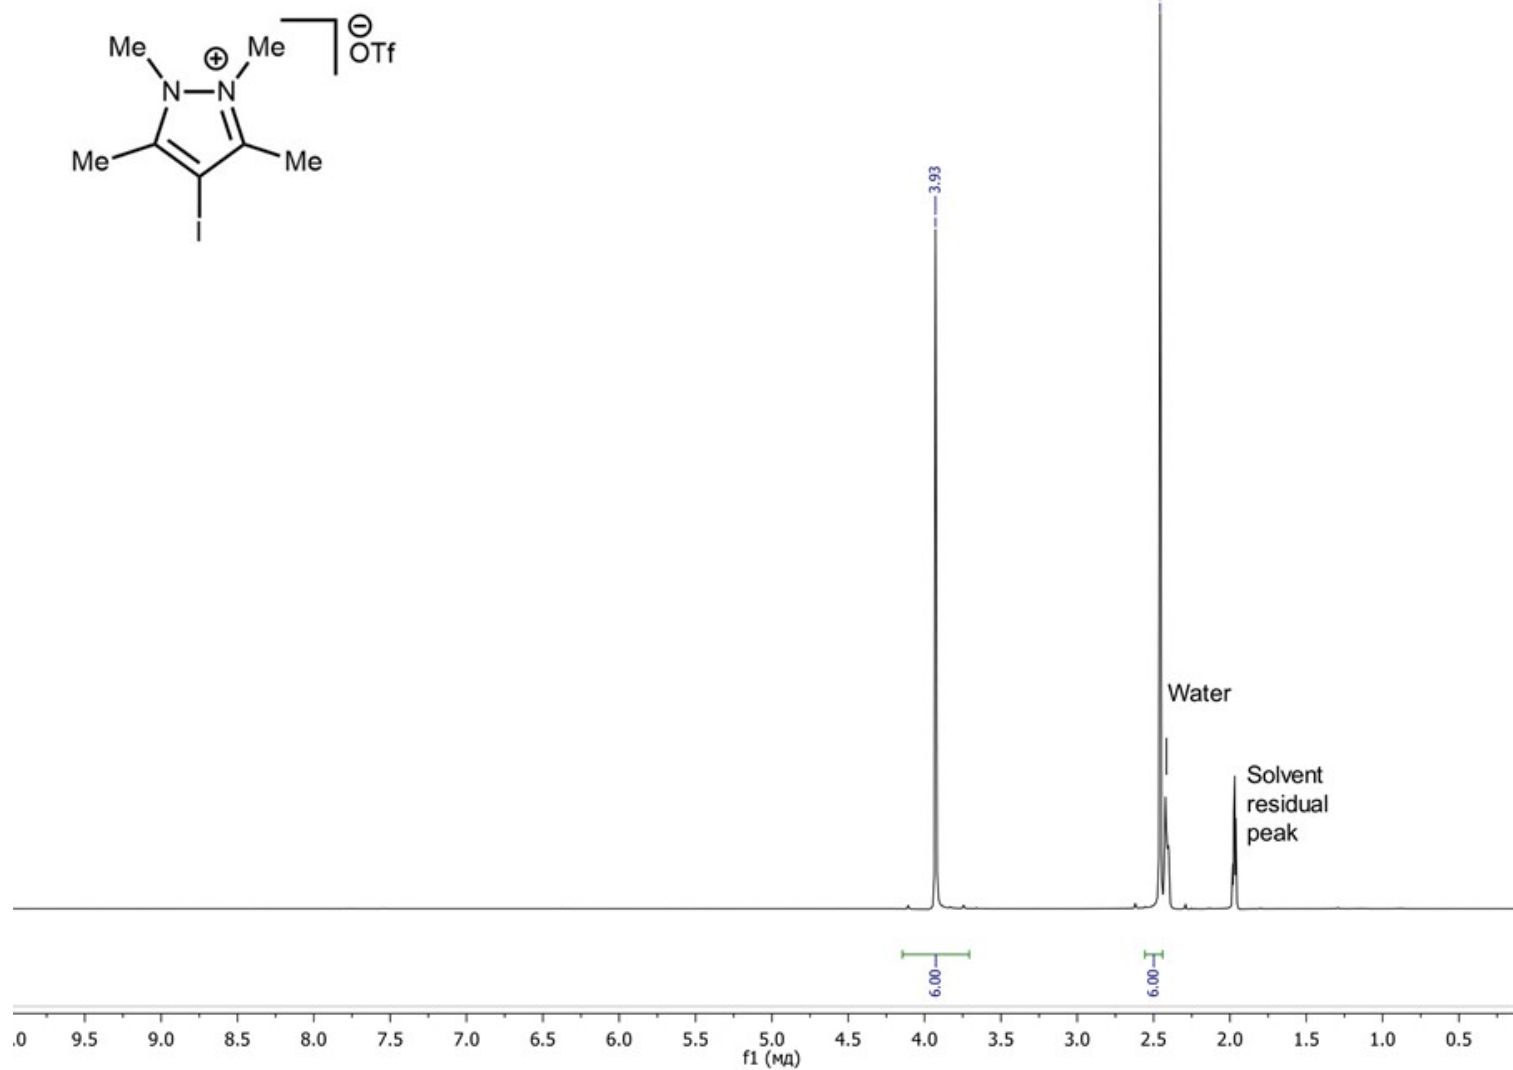

Figure S16. <sup>1</sup>H NMR spectrum of 3(OTf).

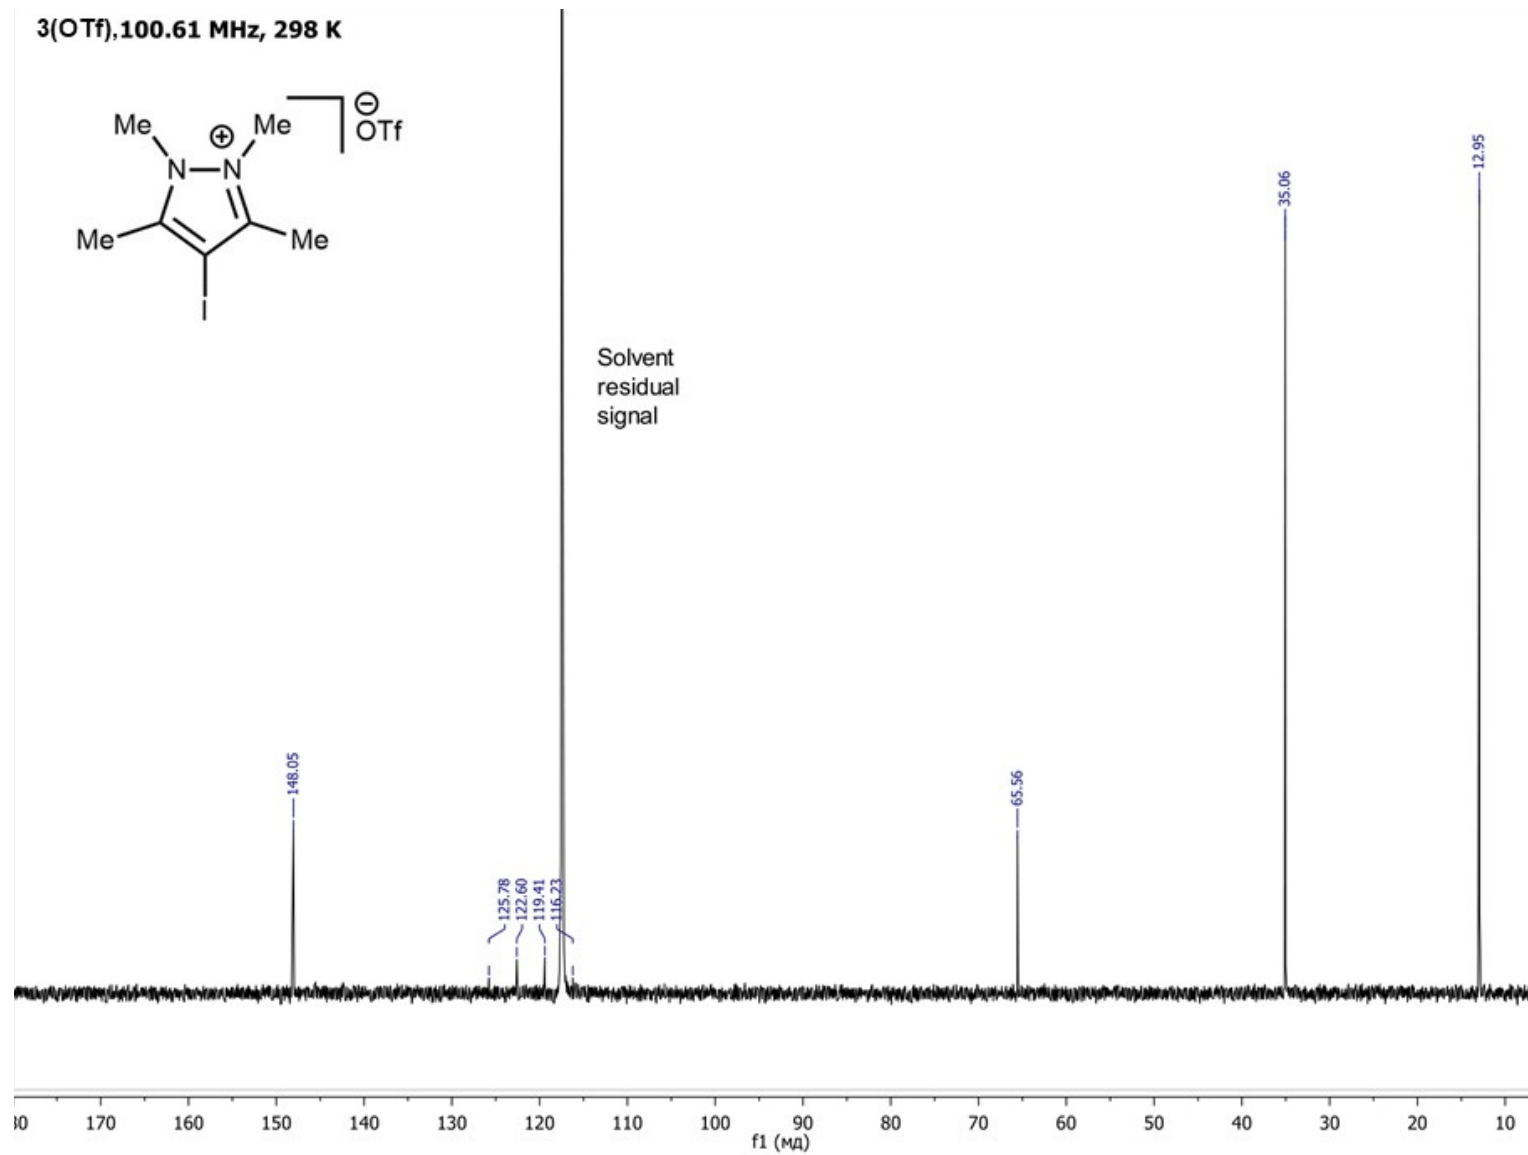

**Figure S17.**  $^{13}\text{C}$  NMR spectrum of **3(OTf)**.



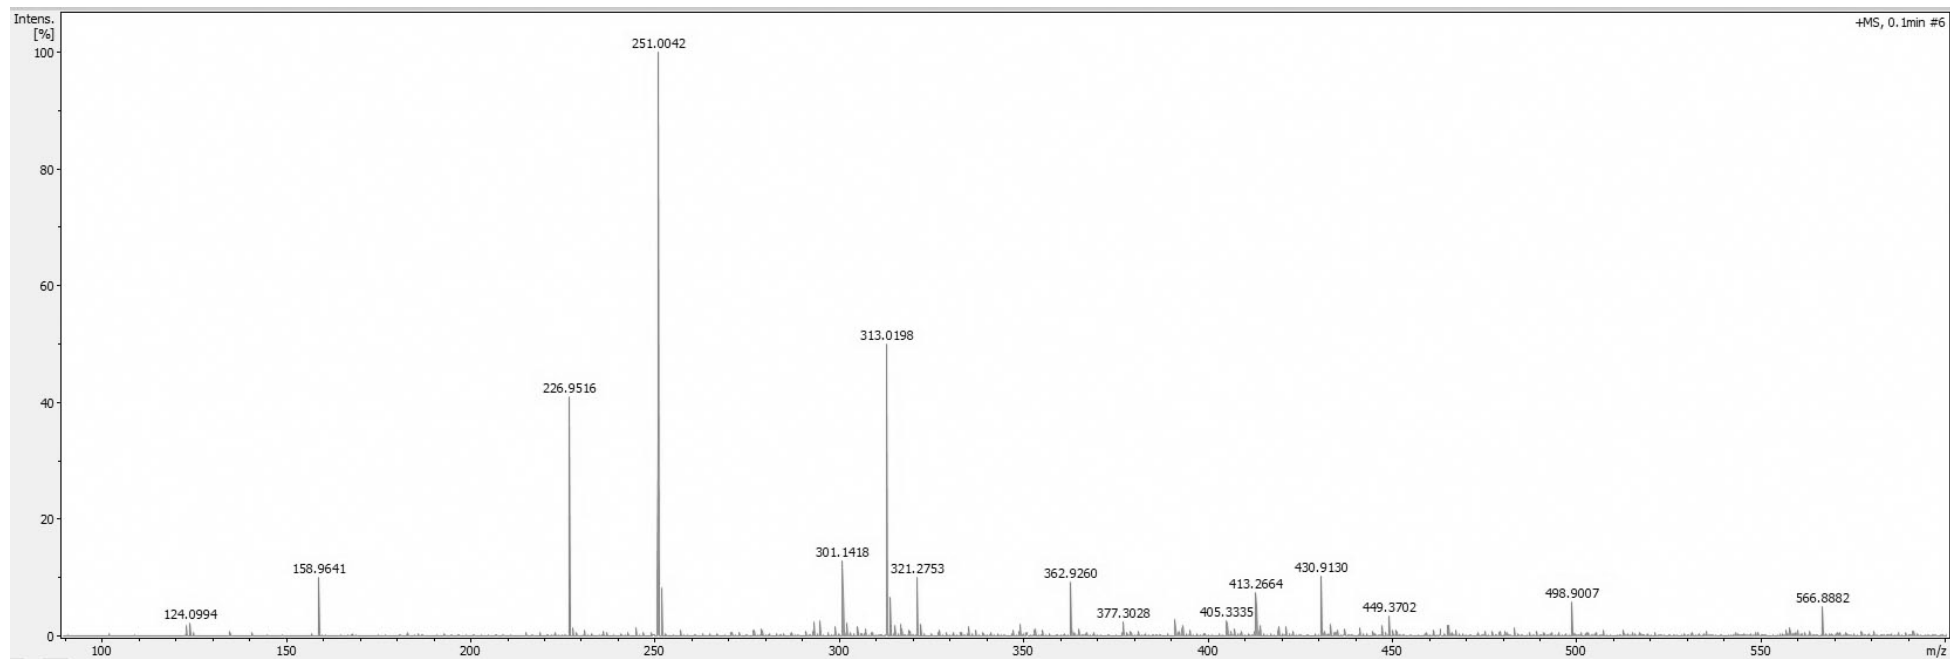

**Figure S18.** HRESI<sup>+</sup>-MS of 3(OTf).

### <sup>1</sup>H NMR monitoring of the reaction of **1a**(OTf) with bases

Diisopropylethylamine (760 mM, 10  $\mu$ L, 0.0076 mmol) and TEMPO (76 mM, 10  $\mu$ L, 0.00076 mmol) as the free radical scavenger were added to the (CD<sub>3</sub>)<sub>2</sub>CO solution of **1a**(OTf) (12.7 mM, 600  $\mu$ L, 0.0076 mmol) and placed in an NMR tube. For the reaction without free radical scavenger, the same quantity of the amine was added to the (CD<sub>3</sub>)<sub>2</sub>CO solution of **1a**(OTf) and placed in an NMR tube. For the reaction with inorganic bases, the same quantity of **1a**(OTf) was dissolved in 580  $\mu$ L (CD<sub>3</sub>)<sub>2</sub>CO, added to the D<sub>2</sub>O solution of NaOH and K<sub>2</sub>CO<sub>3</sub> (1.25 mM, 20  $\mu$ L, 0.025 mmol) and placed in an NMR tube. The NMR tube was sealed, and the obtained homogeneous solution was maintained at RT for 24 h in an NMR spectrometer. The reaction was monitored by measuring the time-dependent integral density of the pyrazole proton group signals in **1a**(OTf) and in the product of the reaction. For all reactions, the conversion coincides with the yield of the main product, and for the reaction with K<sub>2</sub>CO<sub>3</sub>, a by-product is formed along with the main product.

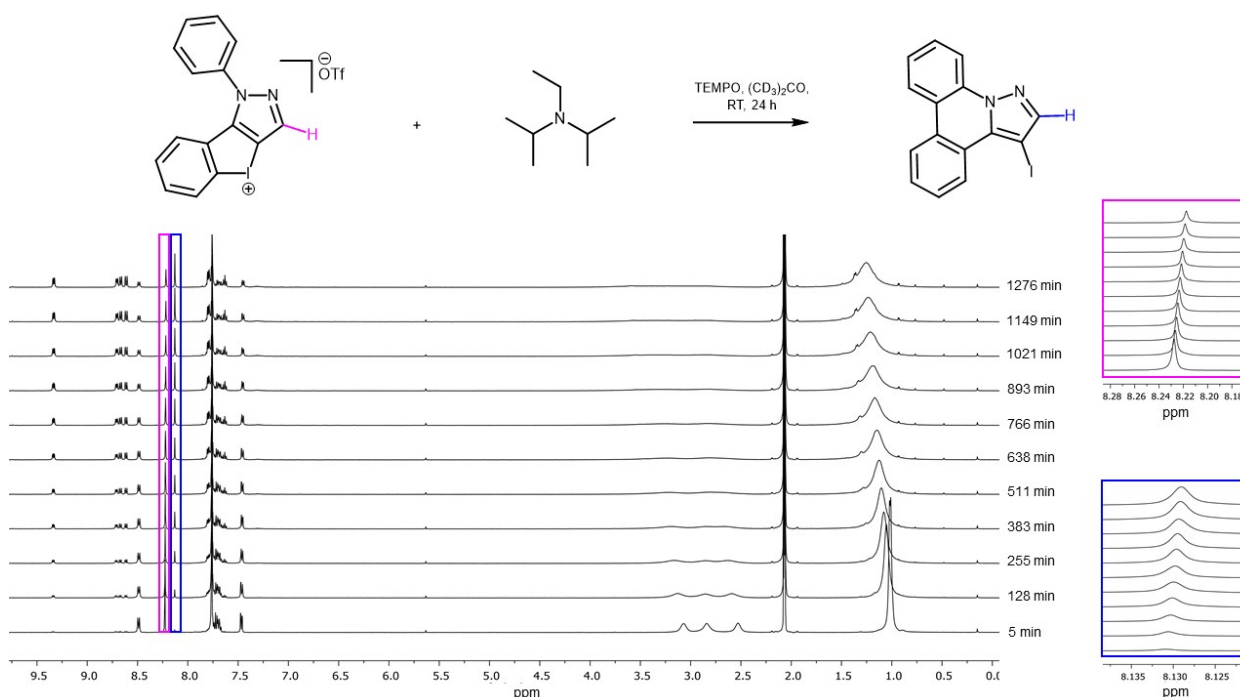

**Figure S19.** <sup>1</sup>H NMR spectra of the monitoring reaction **1a**(OTf) with DIPEA in the presence of TEMPO at the different time intervals.

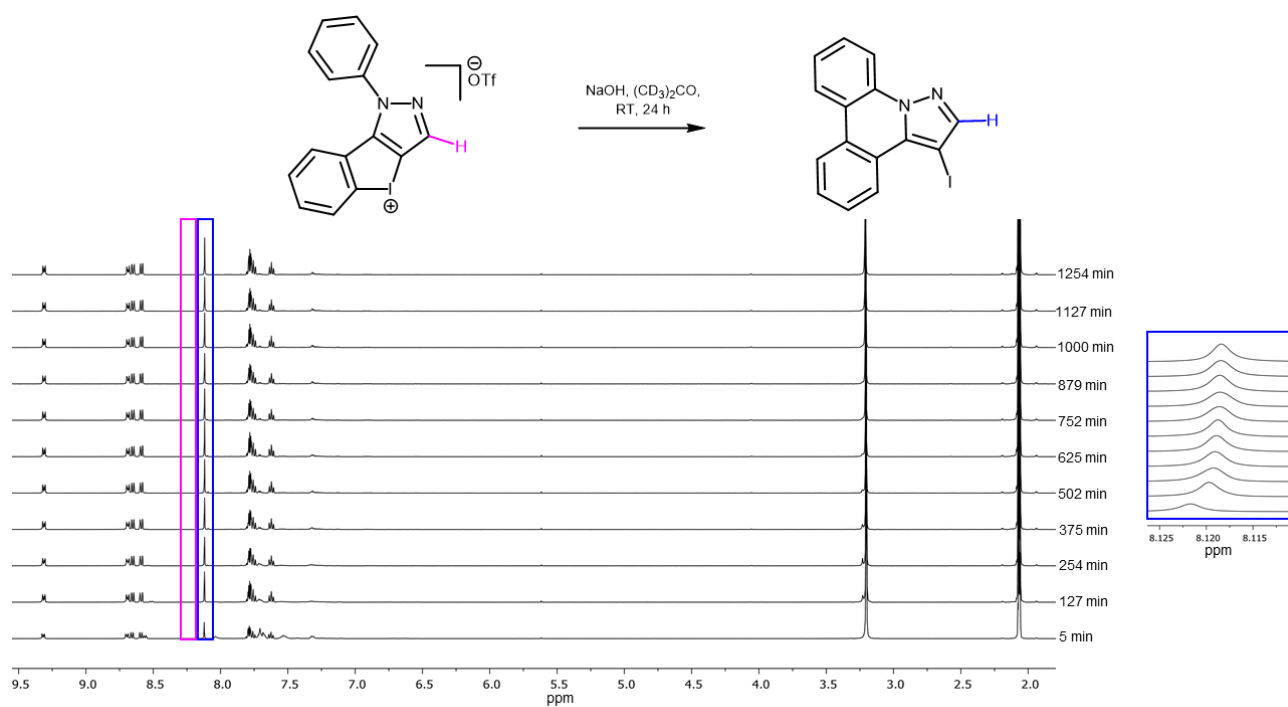

**Figure S20.**  $^1\text{H}$  NMR spectra of the monitoring reaction **1a(OTf)** with NaOH at the different time intervals.

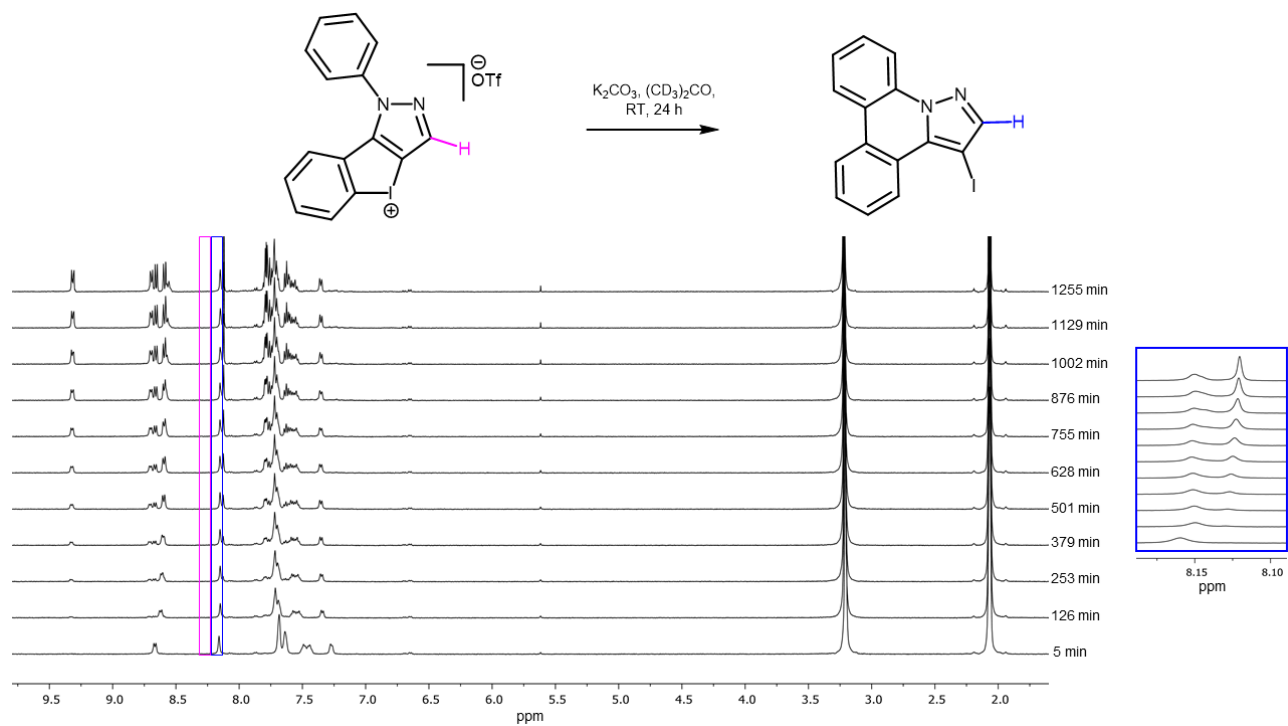

**Figure S21.**  $^1\text{H}$  NMR spectra of the monitoring reaction **1a(OTf)** with  $\text{K}_2\text{CO}_3$  at the different time intervals.

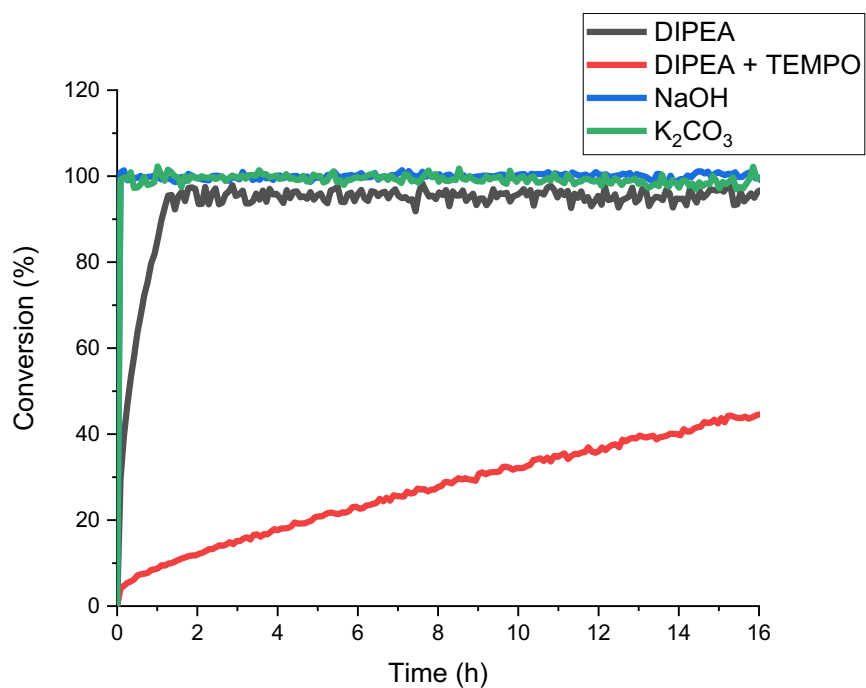

**Figure S22.** <sup>1</sup>H NMR monitoring of the reaction of **1a**(OTf) with different bases.

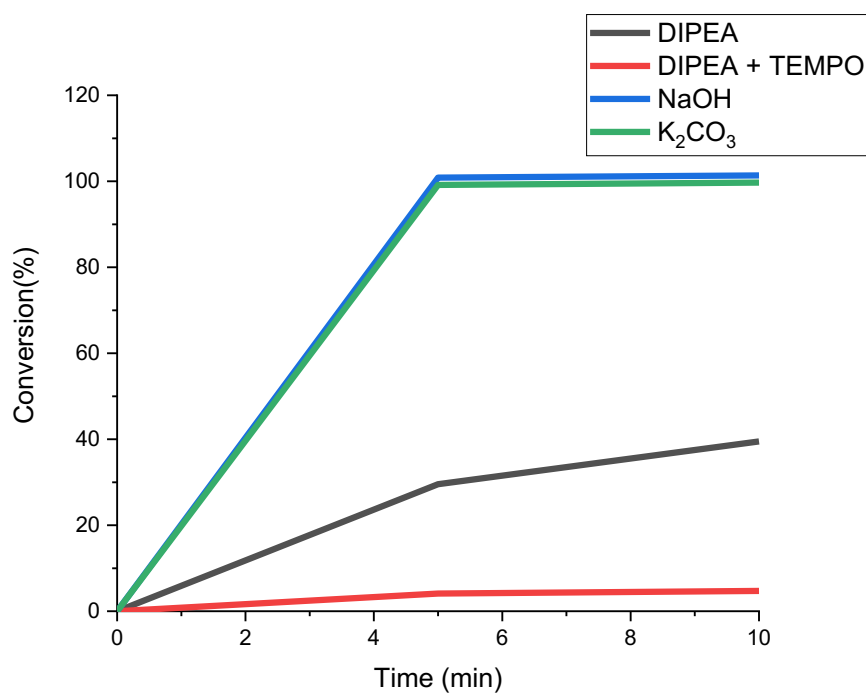

**Figure S23.** <sup>1</sup>H NMR monitoring of the reaction of **1a**(OTf) with different bases within the first 10 minutes.

**Table S1.** Crystal data for **2a(OTf)<sub>2</sub>**.

|                                             |                                                                                              |
|---------------------------------------------|----------------------------------------------------------------------------------------------|
| Identification code                         | <b>2a(OTf)<sub>2</sub></b>                                                                   |
| Empirical formula                           | C <sub>18</sub> H <sub>13</sub> F <sub>6</sub> IN <sub>2</sub> O <sub>6</sub> S <sub>2</sub> |
| Formula weight                              | 658.32                                                                                       |
| Temperature/K                               | 100(2)                                                                                       |
| Crystal system                              | triclinic                                                                                    |
| Space group                                 | P-1                                                                                          |
| a/Å                                         | 9.9399(5)                                                                                    |
| b/Å                                         | 10.6305(5)                                                                                   |
| c/Å                                         | 11.8378(4)                                                                                   |
| α/°                                         | 64.339(4)                                                                                    |
| β/°                                         | 84.268(3)                                                                                    |
| γ/°                                         | 83.514(4)                                                                                    |
| Volume/Å <sup>3</sup>                       | 1118.45(9)                                                                                   |
| Z                                           | 2                                                                                            |
| ρ <sub>calc</sub> g/cm <sup>3</sup>         | 1.955                                                                                        |
| μ/mm <sup>-1</sup>                          | 13.845                                                                                       |
| F(000)                                      | 644                                                                                          |
| Crystal size/mm <sup>3</sup>                | 0.08 × 0.05 × 0.03                                                                           |
| Radiation                                   | Cu Kα (λ = 1.54184)                                                                          |
| 2θ range for data collection/°              | 8.3 to 124.982                                                                               |
| Index ranges                                | -11 ≤ h ≤ 11, -12 ≤ k ≤ 12, -13 ≤ l ≤ 12                                                     |
| Reflections collected                       | 9126                                                                                         |
| Independent reflections                     | 3519 [R <sub>int</sub> = 0.0809, R <sub>sigma</sub> = 0.0667]                                |
| Data/restraints/parameters                  | 3519/0/311                                                                                   |
| Goodness-of-fit on F <sup>2</sup>           | 1.216                                                                                        |
| Final R indexes [I ≥ 2σ (I)]                | R1 = 0.0850, wR2 = 0.2504                                                                    |
| Final R indexes [all data]                  | R1 = 0.1002, wR2 = 0.2881                                                                    |
| Largest diff. peak/hole / e·Å <sup>-3</sup> | 2.70/-2.30                                                                                   |
| CSD code                                    | 2354600                                                                                      |

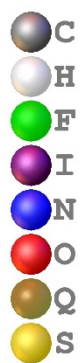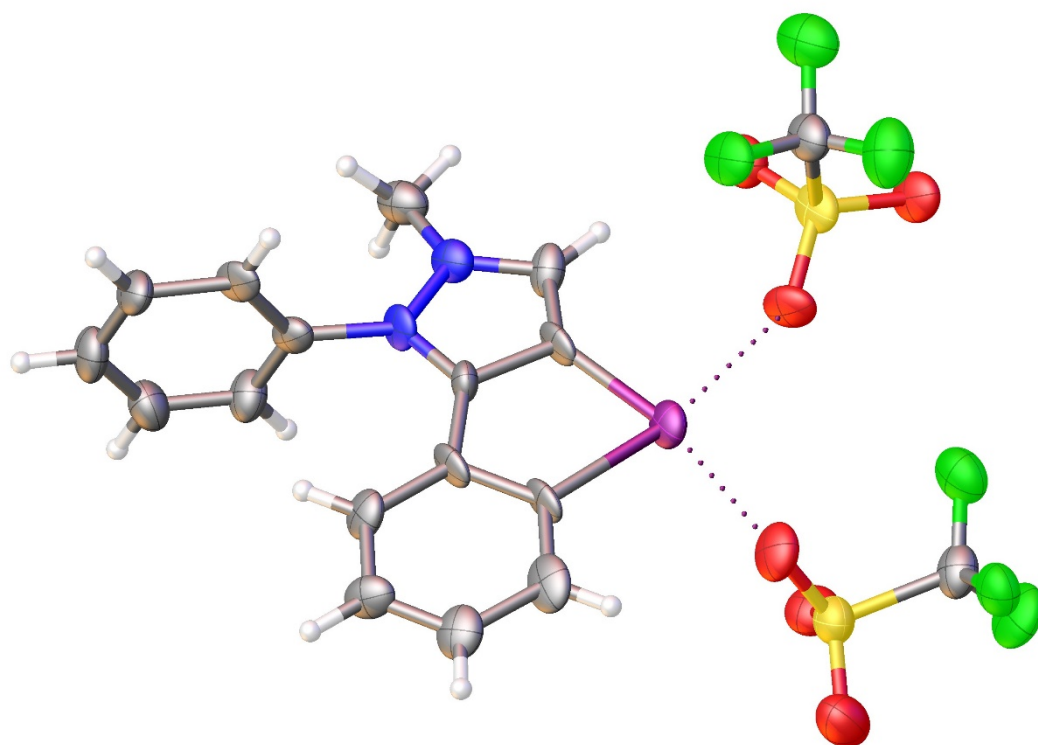

**Figure S24.** A thermal ellipsoid plot for **2a(OTf)<sub>2</sub>**.

## References

1. D. A. Polonnikov, M. V. Il'in, Y. V. Safinskaya, I. S. Aliyarova, A. S. Novikov and D. S. Bolotin, *Org. Chem. Front.*, 2023, **10**, 169–180.
2. A. Boelke, T. J. Kuczmera, E. Lork and B. J. Nachtsheim, *Chem.–Eur. J.*, 2021, **27**, 13128–13134.
3. L. Palatinus and G. Chapuis, *J. Appl. Crystallogr.*, 2007, **40**, 786–790.
4. G. M. Sheldrick, *Acta Crystallogr.*, 2015, **A71**, 3–8.
5. G. M. Sheldrick, *Acta Cryst.*, 2008, **A64**, 112–122.
6. O. V. Dolomanov, L. J. Bourhis, R. J. Gildea, J. A. K. Howard and H. Puschmann, *J. Appl. Crystallogr.*, 2009, **42**, 339–341.
7. A. A. Sysoeva, A. S. Novikov, M. V. Il'in, V. V. Suslonov and D. S. Bolotin, *Org. Biomol. Chem.*, 2021, **19**, 7611–7620.
